# Supplementary material for: Mono- and dinuclear zinc complexes bearing identical bis(thiosemicarbazone) ligand that exhibit alkaline phosphatase-like catalytic reactivity
Source: Springer Nature journal article supplement (doi:10.1007/s00775-021-01909-0), 2021-10-29
Supplement: 775_2021_1909_MOESM1_ESM.pdf [file 775_2021_1909_MOESM1_ESM.pdf]

## Supporting Information

### **Mono- and dinuclear zinc complexes bearing identical bis(thiosemicarbazone) ligand that exhibit alkaline phosphatase-like catalytic reactivity**

Hyeri Jeon,<sup>a,1</sup> Hugo Vazquez-Lima,<sup>b,1,2</sup> Haewon Jeong,<sup>a</sup> Kyung-Bin Cho,<sup>b,\*</sup> Seungwoo Hong,<sup>a,\*</sup>

<sup>a</sup> Department of Chemistry, Sookmyung Women's University, Seoul 04310, Republic of Korea

<sup>b</sup> Department of Chemistry, Jeonbuk National University, Jeonju 54896, Korea

<sup>1</sup>These authors contributed equally to this manuscript.

<sup>2</sup> Present address: Department of Inorganic Chemistry, Meritorious Autonomous University of Puebla, Puebla 72000, Mexico

E-mail: workforkyung@jbnu.ac.kr; hsw@sm.ac.kr

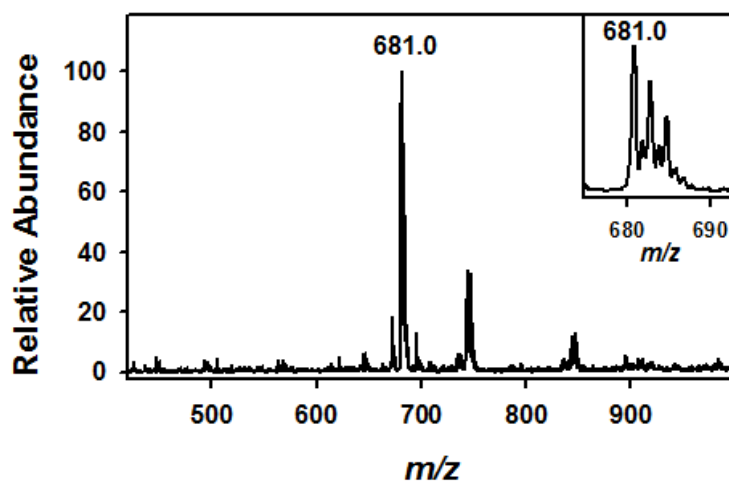

**Fig. S1.** Negative mode ESI MS spectrum obtained in the reaction of **1** (0.020 mM) with 4-NPP in DMSO at 40 °C. A prominent peak at  $m/z$  of 681.0, whose mass and isotopic distribution pattern correspond to  $\{\text{Na}[\text{Zn}(\text{bTSC})(\text{NO}_2\text{PO}_4\text{C}_6\text{H}_5)(\text{CH}_3\text{CN})_2(\text{CH}_3\text{O})]\}^-$  (calculated  $m/z$  of 681.1). Insets show the observed isotopic distribution patterns of the peak at 681.0.

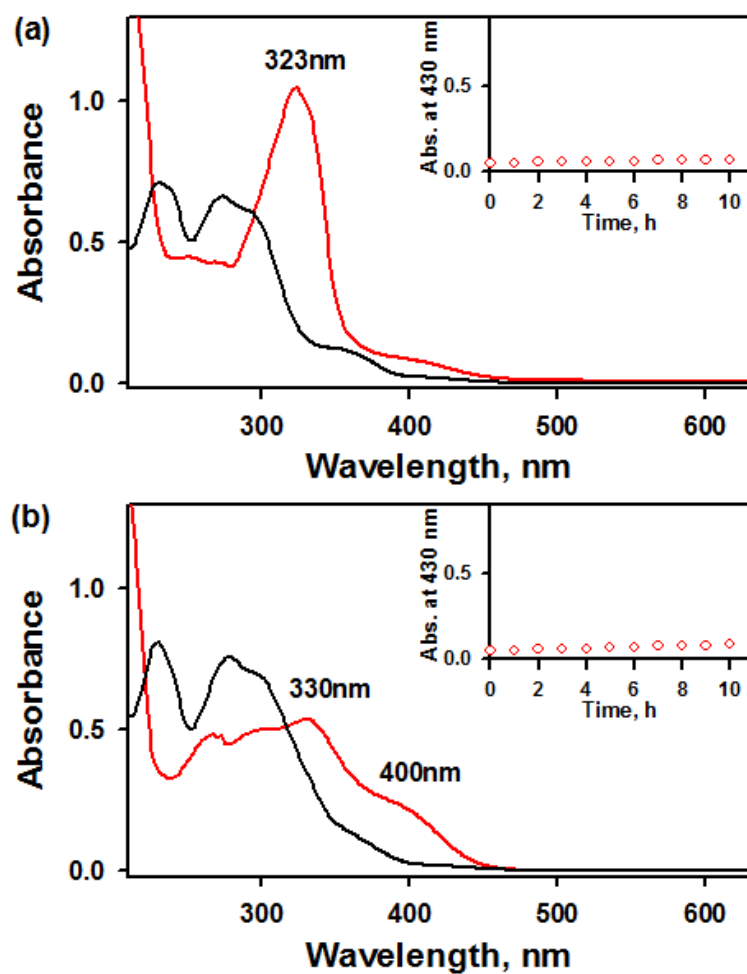

**Fig. S2.** UV-vis spectra of the reaction of **1** (black line,  $2.0 \times 10^{-2}$  mM) with 4-NPP (blue line,  $2.0 \times 10^{-1}$  mM) in (a) CH<sub>3</sub>CN and (b) CH<sub>3</sub>OH at 40 °C. Inset shows the time course monitored at 430 nm. In CH<sub>3</sub>OH, the formation of **2** was observed upon addition of 4-NPP suggesting that 4-NPP acts as base in CH<sub>3</sub>OH.

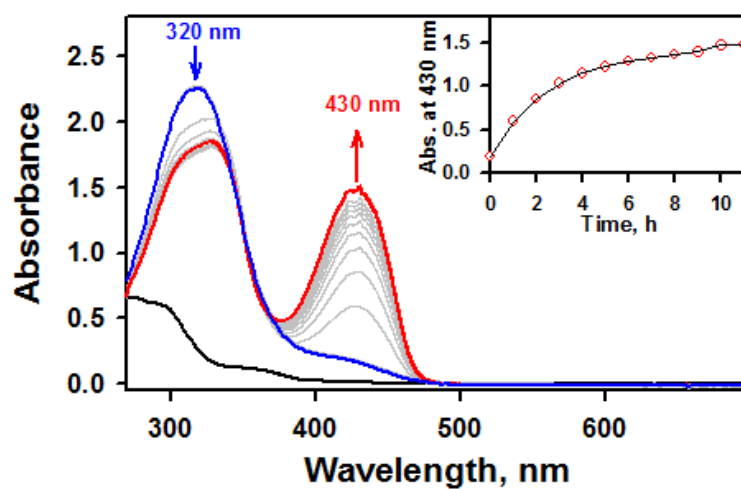

**Fig S3.** UV-vis spectral changes obtained in the reaction of **1** (black line,  $2.0 \times 10^{-2}$  mM) with 4-NPP (blue line,  $2.0 \times 10^{-1}$  mM) in DMF at 40 °C. The formation of 4-NP (red line) was detected at 430 nm. Inset shows the time course monitored at 430 nm due to 4-NP (red dot).

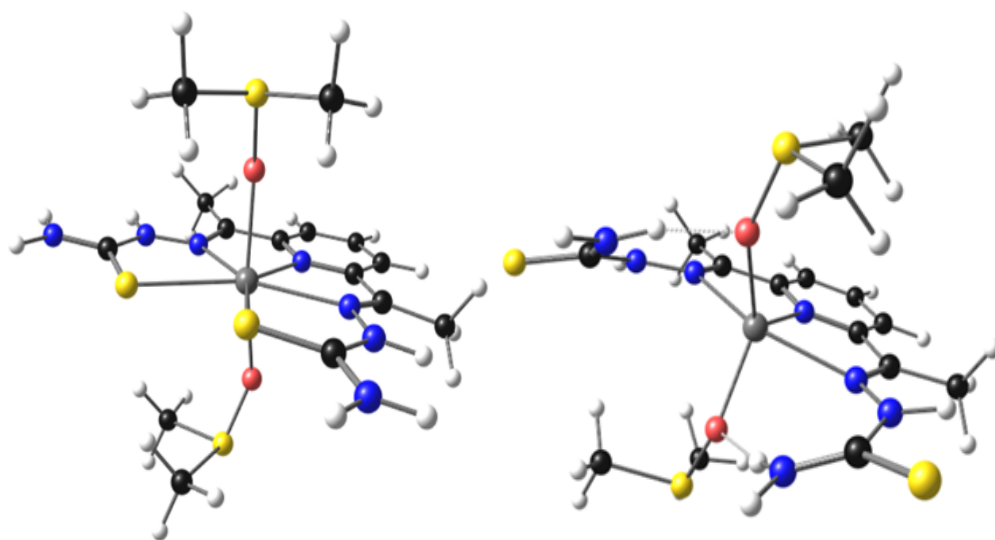

**Fig. S4.** Two conformations for **1** in DMSO. Left, **1<sub>A</sub>**; right, **1<sub>B</sub>**,

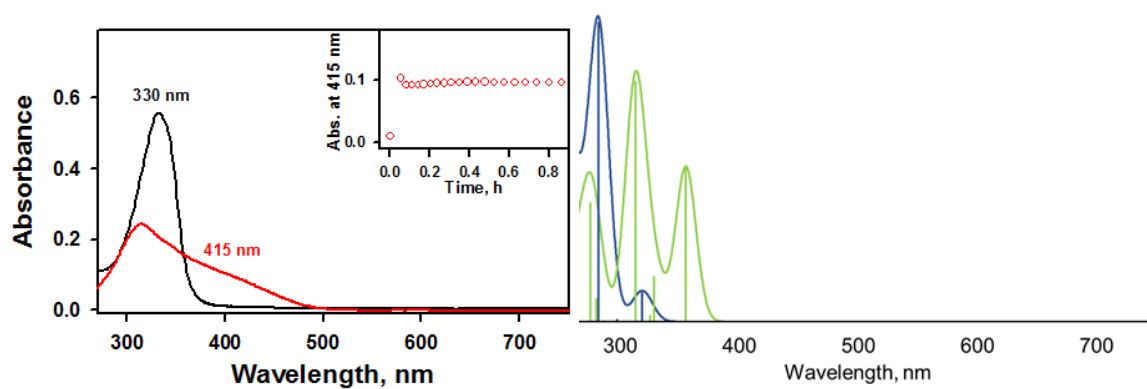

**Fig. S5.** UV-vis absorption spectra simulation with TDDFT of conformers **1<sub>A</sub>** and **1<sub>B</sub>**. Left, experimental data from Fig. S15 presented as comparison. Right simulation with conformer **1<sub>A</sub>** (blue) and conformer **1<sub>B</sub>**, (green).

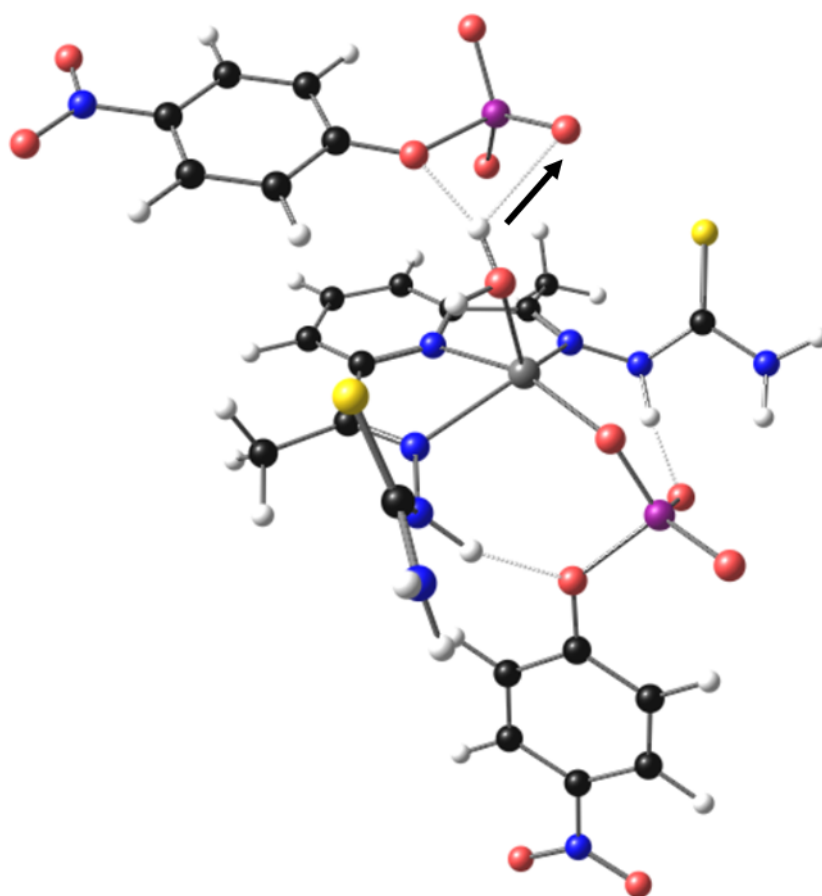

**Fig. S6.** Deprotonation of water molecule coordinated to Zn. DFT-optimized transition state structure of  $[\text{Zn}(\text{bTSC})(\text{PO}_4\text{C}_6\text{H}_4\text{NO}_2)_2(\text{H}_2\text{O})]^{2-}$ . Arrows indicate the atom movements in the forward reaction direction. Zn, silver; S, yellow; N, blue; O, red; P, purple; C, black; H.

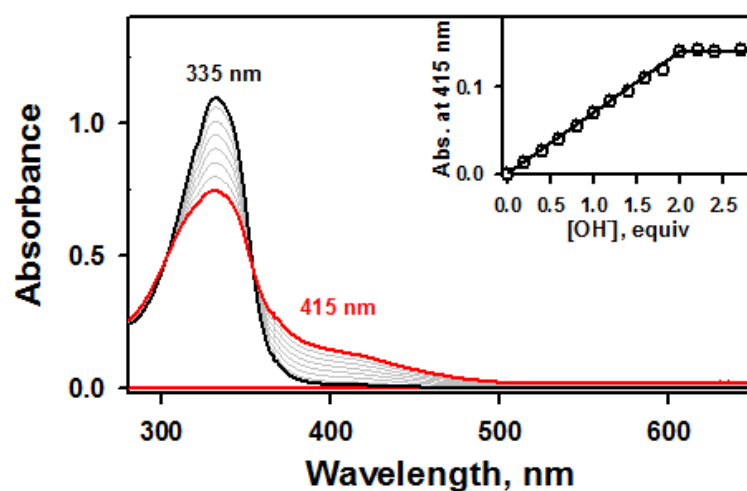

**Fig. S7.** UV-vis spectral changes showing the formation of **2** (red line,  $2.0 \times 10^{-2}$  mM) and disappearance of **1** (black line,  $1.0 \times 10^{-2}$  mM) upon addition of KOH to **1** in increment of 0.20 equiv in DMSO at 40 °C. Inset shows the plot of absorbance changes at 415 nm due to **2** (black dot) and against the equivalents of KOH added to **1** in DMSO at 40 °C.



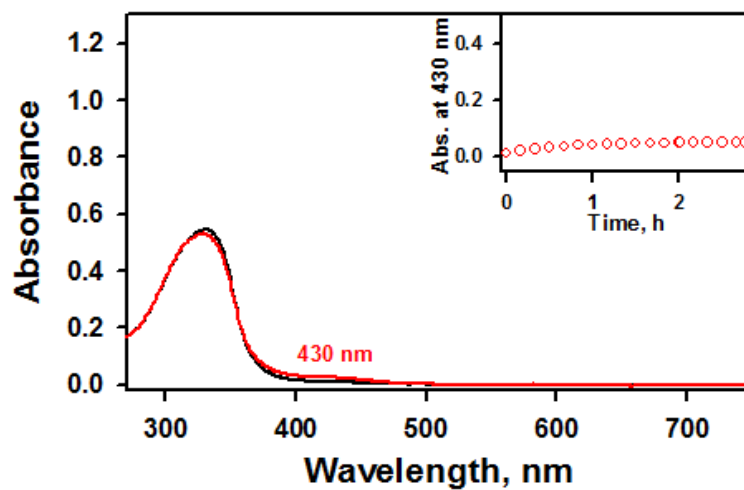

**Fig. S8.** Overlaid UV-vis spectra of 4-NPP ( $1.0 \times 10^{-1}$  mM) in the absence (black line) and presence (red line) of KOH ( $1.0 \times 10^{-2}$  mM) in DMSO at 40 °C. Inset shows the plot of absorbance changes at 430 nm due to the formation of 4-NP.

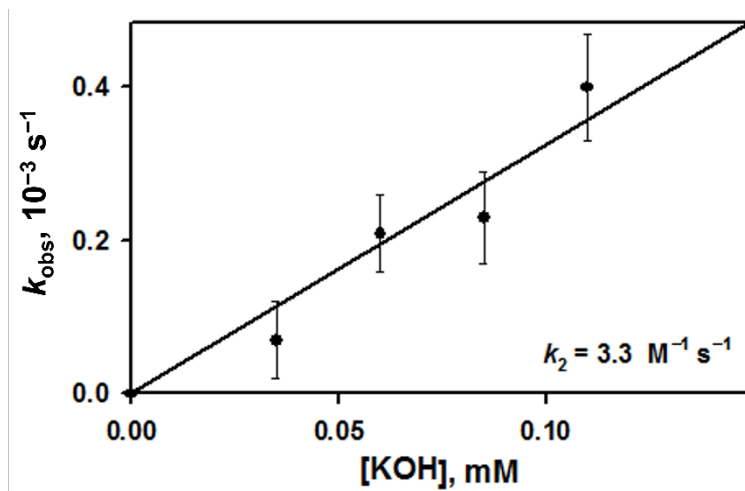

**Fig. S9.** Plot of pseudo-first-order rate constants ( $k_{\text{obs}}$ ) against the concentrations of KOH to determine the  $k_2$  value for **2** in DMSO at 40 °C.

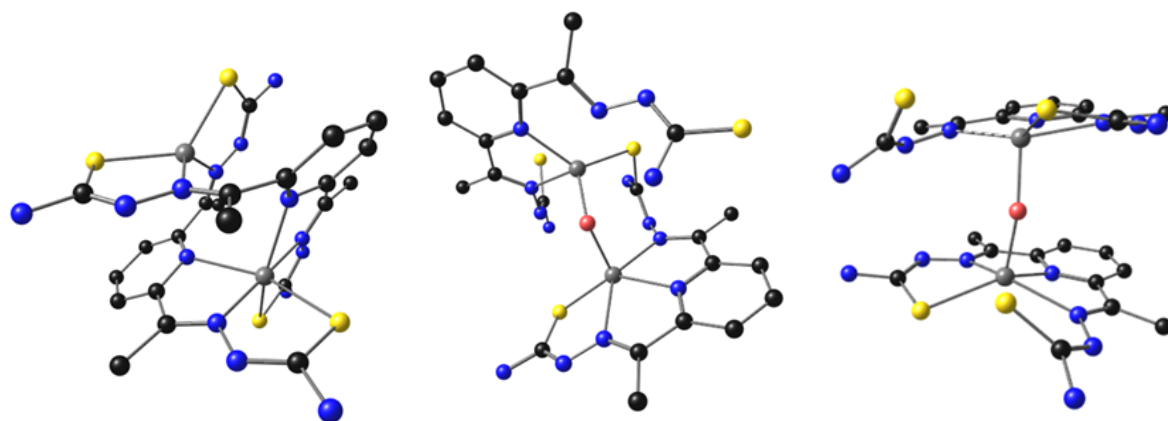

**Fig. S10.** Three conformations for **2** in DMSO. Left, **2<sub>A</sub>**; middle, **2<sub>B</sub>**; right, **2<sub>C</sub>**. Hydrogens omitted for clarity.

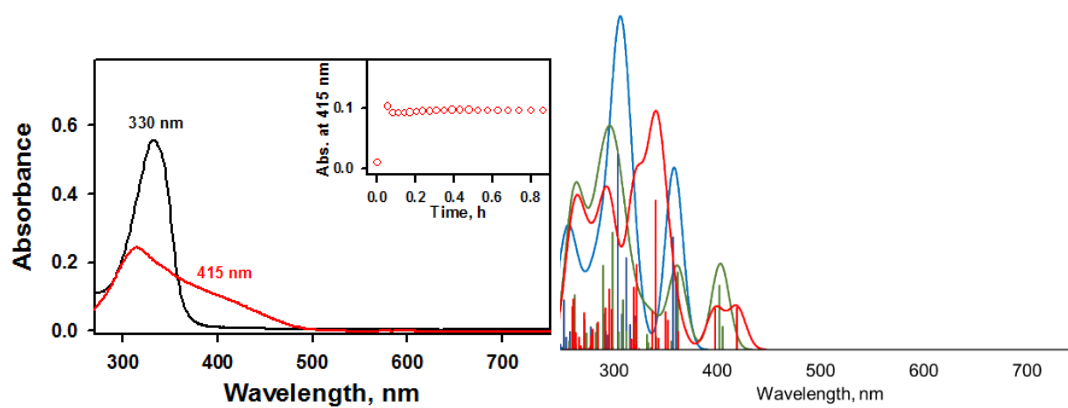

**Fig. S11.** UV-vis absorption spectra simulation with TDDFT of conformers **2<sub>A</sub>**, **2<sub>B</sub>**, and **2<sub>C</sub>**. Left, experimental data from Fig. S15 is presented as comparison. Right simulation of **2<sub>A</sub>** (blue), **2<sub>B</sub>** (green), and **2<sub>C</sub>** (red).

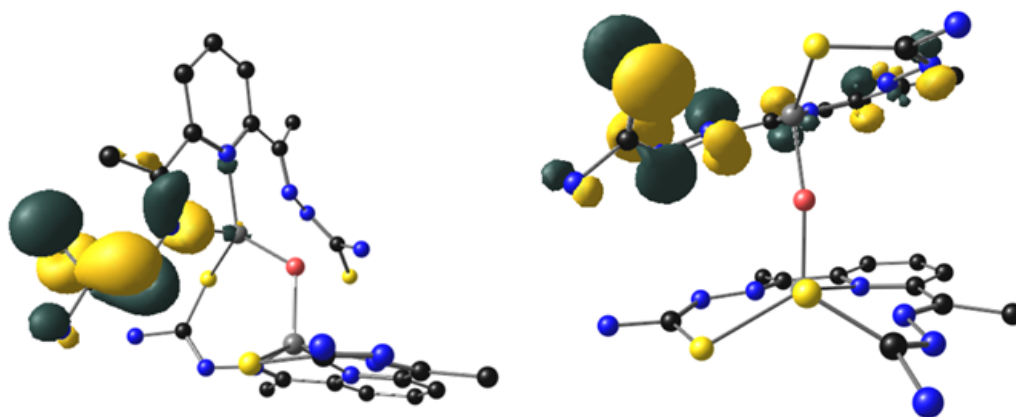

**Fig. S12.** Occupied NTO with the highest contribution to the lowest energy electronic transition of **2<sub>B</sub>** (left) and **2<sub>C</sub>** (right). Hydrogens are omitted for clarity.

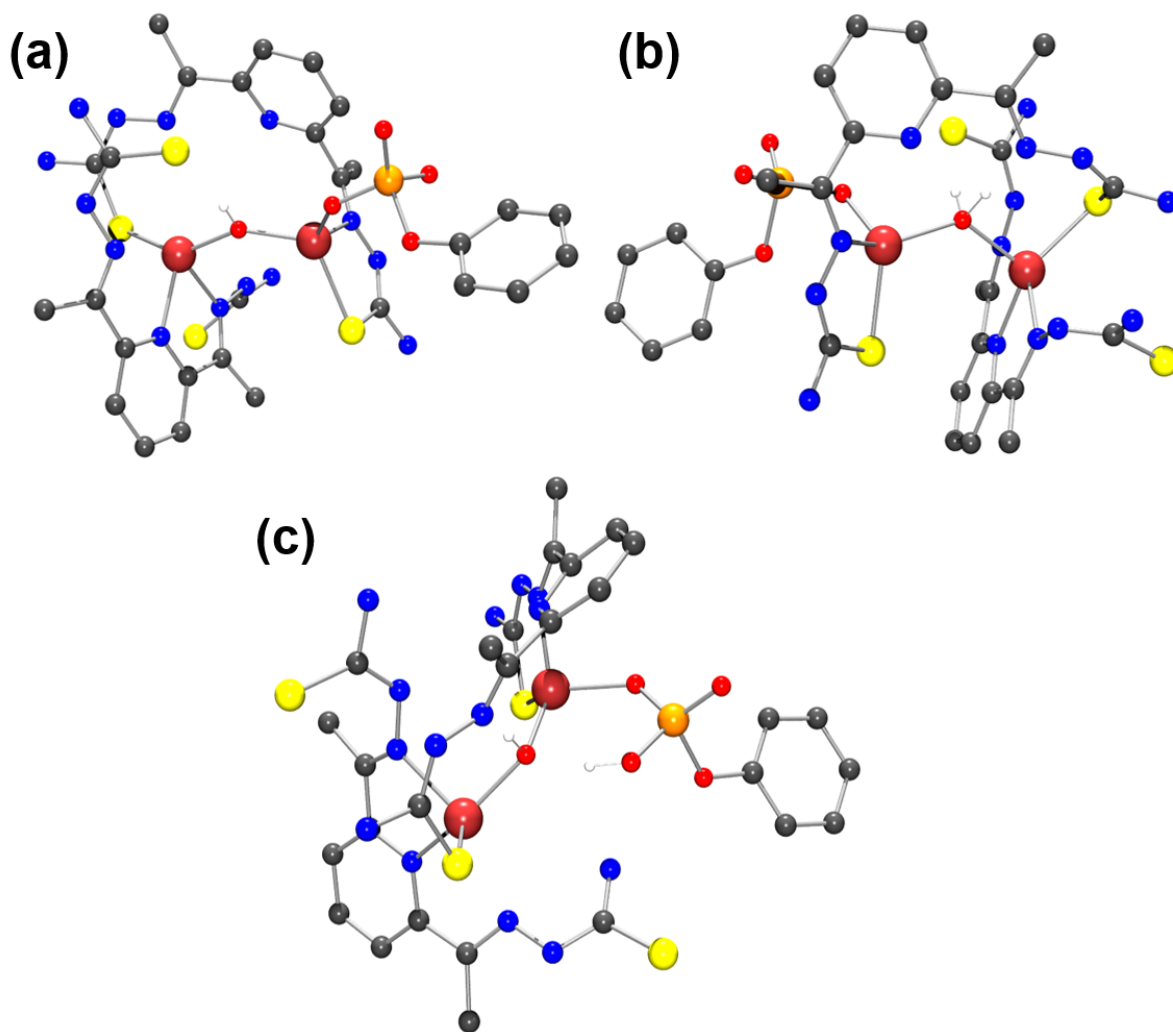

**Fig. S13.** Alternative structures of **2** found using DFT. Zn, dark red; S, yellow; N, blue; O, red; P, orange; C, gray; H, white. Hydrogens are omitted for clarity except for in H<sub>2</sub>O, OH<sup>-</sup>, and 4-NPPH.

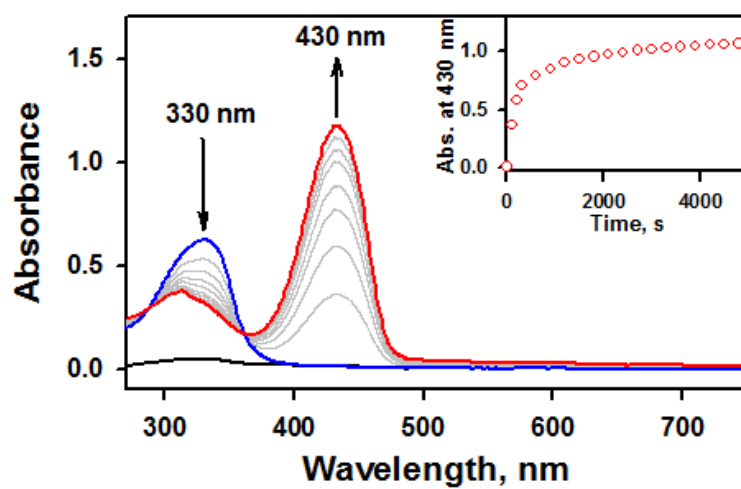

**Fig. S14.** UV-vis spectral changes obtained in the reaction of **2** (black line,  $1.0 \times 10^{-4}$  mM) with 4-NPP ( $1.0 \times 10^{-1}$  mM) in the presence of KOH ( $1.0 \times 10^{-1}$  mM) in DMSO at 40 °C. Inset shows the plot of absorbance changes at 430 nm due to 4-NP (red dot) with respect to the time (s) in DMSO at 40 °C.

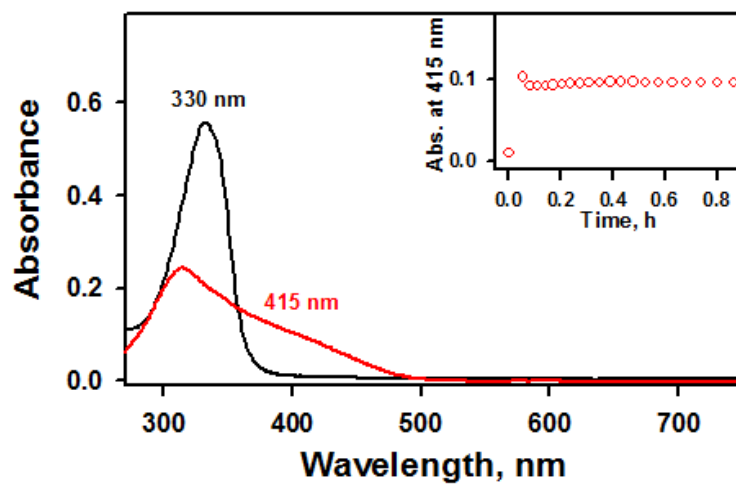

**Fig. S15.** UV-vis spectral changes showing the conversion from **1** (black line,  $1.0 \times 10^{-2}$  mM) to **2** (red line,  $1.0 \times 10^{-2}$  mM) upon addition of KOH ( $3.0 \times 10^{-1}$  mM) in DMSO at 40 °C. Inset shows the plot of absorbance changes at 415 nm due to **2** (red dot) with respect to time in DMSO at 40 °C.



**Table S1.** Relative energies in kcal mol<sup>-1</sup> for the monomeric species

|                                                                                                                              | $\Delta\text{Def2-SVP}$ | $\Delta\Delta\text{ Def2-TZVPP}$ | $\Delta E^a$  | $\Delta\Delta Z_0$ | $\Delta\Delta E_{\text{thermal}}^b$ | $-\text{T}\Delta\Delta S^b$ | $\Delta\Delta\text{Disp}$ | $\Delta G^c$  |
|------------------------------------------------------------------------------------------------------------------------------|-------------------------|----------------------------------|---------------|--------------------|-------------------------------------|-----------------------------|---------------------------|---------------|
| <b>Deprotonation of one Zn-OH<sub>2</sub> proton by external 4-NPP</b>                                                       |                         |                                  |               |                    |                                     |                             |                           |               |
| $[\text{Zn}(\text{bTSC})(\text{PO}_4\text{C}_6\text{H}_4\text{NO}_2)_2(\text{H}_2\text{O})]^{2-}$                            |                         |                                  |               |                    |                                     |                             |                           |               |
| Reactants                                                                                                                    | 0.0                     | +0.0                             | <b>0.0</b>    | +0.0               | +0.0                                | +0.0                        | 0.0                       | <b>0.0</b>    |
| Transition state                                                                                                             | 0.1                     | -0.6                             | <b>-0.4</b>   | -0.4               | -0.3                                | 0.2                         | -0.1                      | <b>-1.1</b>   |
| Products                                                                                                                     | -12.7                   | -1.3                             | <b>-14.1</b>  | -1.2               | +0.0                                | -2.2                        | +7.3                      | <b>-6.9</b>   |
| $[\text{Zn}(\text{bTSC})(\text{PO}_4\text{C}_6\text{H}_4\text{NO}_2)_2(\text{H}_2\text{O})_3]^{2-}$                          |                         |                                  |               |                    |                                     |                             |                           |               |
| Reactants                                                                                                                    | 0.0                     | +0.0                             | <b>0.0</b>    | +0.0               | +0.0                                | +0.0                        | 0.0                       | <b>0.0</b>    |
| Transition state                                                                                                             | 3.7                     | -0.8                             | <b>3.0</b>    | -4.5               | -0.1                                | +0.0                        | -0.2                      | <b>-1.9</b>   |
| Products                                                                                                                     | 0.5                     | -1.4                             | <b>-1.0</b>   | -0.9               | +0.4                                | -1.4                        | 0.2                       | <b>-2.7</b>   |
| <b>Direct hydroxyl migration of Zn-OH to the phosphor in 4-NPP</b>                                                           |                         |                                  |               |                    |                                     |                             |                           |               |
| $[\text{Zn}(\text{bTSC})(\text{PO}_4\text{C}_6\text{H}_4\text{NO}_2)(\text{OH})]^- + \text{DMSO}$                            |                         |                                  |               |                    |                                     |                             |                           |               |
| Reactants                                                                                                                    | 0.00                    | +0.00                            | <b>0.00</b>   | +0.00              | +0.00                               | +0.00                       | +0.00                     | <b>0.00</b>   |
| Transition state                                                                                                             | 18.14                   | +7.23                            | <b>25.38</b>  | -0.36              | -0.54                               | +1.16                       | -2.47                     | <b>23.17</b>  |
| Products                                                                                                                     | 2.16                    | -1.07                            | <b>1.09</b>   | -0.56              | +0.18                               | -2.92                       | +2.44                     | <b>0.24</b>   |
| <b>Water splitting and formation of Zn-OH<sub>2</sub>, HPO<sub>4</sub><sup>2-</sup> and 4-NP through intermediary waters</b> |                         |                                  |               |                    |                                     |                             |                           |               |
| $[\text{Zn}(\text{bTSC})(\text{PO}_4\text{C}_6\text{H}_4\text{NO}_2)(\text{OH})]^- + \text{H}_2\text{O}$                     |                         |                                  |               |                    |                                     |                             |                           |               |
| Reactants                                                                                                                    | 0.00                    | +0.00                            | <b>0.00</b>   | +0.00              | +0.00                               | +0.00                       | +0.00                     | <b>0.00</b>   |
| Transition state                                                                                                             | 29.53                   | +2.62                            | <b>32.15</b>  | -1.83              | +0.07                               | +0.13                       | -2.25                     | <b>28.29</b>  |
| Products                                                                                                                     | 8.53                    | -2.43                            | <b>6.10</b>   | -1.22              | +0.27                               | -1.62                       | +0.25                     | <b>3.78</b>   |
| $[\text{Zn}(\text{bTSC})(\text{PO}_4\text{C}_6\text{H}_4\text{NO}_2)(\text{OH})]^- + 6 \text{H}_2\text{O}$                   |                         |                                  |               |                    |                                     |                             |                           |               |
| Reactants                                                                                                                    | 0.00                    | +0.00                            | <b>0.00</b>   | +0.00              | +0.00                               | +0.00                       | +0.00                     | <b>0.00</b>   |
| Transition state                                                                                                             | 24.32                   | +2.63                            | <b>26.95</b>  | -1.63              | 0.46                                | -1.44                       | +0.21                     | <b>24.54</b>  |
| Products                                                                                                                     | -14.78                  | +3.71                            | <b>-11.07</b> | -0.76              | 0.09                                | -0.55                       | +1.29                     | <b>-10.99</b> |
| $[\text{Zn}(\text{bTSC})(\text{PO}_4\text{C}_6\text{H}_4\text{NO}_2)(\text{OH})]^- + 10 \text{H}_2\text{O}$                  |                         |                                  |               |                    |                                     |                             |                           |               |
| Reactants                                                                                                                    | 0.00                    | +0.00                            | <b>0.00</b>   | +0.00              | +0.00                               | +0.00                       | +0.00                     | <b>0.00</b>   |
| Transition state                                                                                                             | 12.11                   | +3.85                            | <b>15.97</b>  | -0.17              | -0.59                               | +0.95                       | +0.30                     | <b>16.46</b>  |
| Products                                                                                                                     | -10.65                  | -3.76                            | <b>-14.41</b> | -0.19              | -0.50                               | -0.77                       | +5.65                     | <b>-10.21</b> |

<sup>a</sup> Electronic energy, sum of the previous two columns. <sup>b</sup> T = 298 K. <sup>c</sup> Sum of the five previous columns,  $\Delta G = \Delta E + \Delta\Delta Z_0 + \Delta\Delta E_{\text{thermal}} - \text{T}\Delta\Delta S + \Delta\Delta\text{Disp}$ .

**Table S2.** Relative energies in kcal mol<sup>-1</sup> for the dimeric species

|                                                                                              | $\Delta\text{Def2-SVP}$ | $\Delta\Delta\text{ Def2-TZVPP}$ | $\Delta E^a$ | $\Delta\Delta Z_0$ | $\Delta\Delta E_{\text{thermal}}^b$ | $-T\Delta\Delta S^b$ | $\Delta\Delta\text{Disp}$ | $\Delta G^c$ |
|----------------------------------------------------------------------------------------------|-------------------------|----------------------------------|--------------|--------------------|-------------------------------------|----------------------|---------------------------|--------------|
| $[\text{Zn}_2(\text{bTSC})_2(\text{PO}_4\text{C}_6\text{H}_5)(\text{OH})]^{3-}$ ( <b>A</b> ) | 0.00                    | +0.00                            | <b>0.00</b>  | +0.00              | +0.00                               | +0.00                | +0.00                     | <b>0.00</b>  |
| $[\text{Zn}_2(\text{bTSC})_2(\text{PO}_4\text{C}_6\text{H}_5)(\text{OH})]^{3-}$ ( <b>B</b> ) | 20.14                   | -18.58                           | <b>1.56</b>  | -0.57              | +0.40                               | -0.80                | +1.52                     | <b>2.10</b>  |
| $[\text{Zn}_2(\text{bTSC})_2(\text{HPO}_4\text{C}_6\text{H}_5)(\text{OH})]^{2-}$             | 0.00                    | +0.00                            | <b>0.00</b>  | +0.00              | +0.00                               | +0.00                | +0.00                     | <b>0.00</b>  |
| $[\text{Zn}_2(\text{bTSC})_2(\text{PO}_4\text{C}_6\text{H}_5)(\text{H}_2\text{O})]^{2-}$     | 4.97                    | +5.18                            | <b>10.15</b> | -1.20              | +0.18                               | -1.06                | -1.17                     | <b>6.89</b>  |
| $[\text{Zn}_2(\text{bTSC})_2(\text{HPO}_4)]^{2-}$                                            | 0.00                    | +0.00                            | <b>0.00</b>  | +0.00              | +0.00                               | +0.00                | +0.00                     | <b>0.00</b>  |

<sup>a</sup> Electronic energy, sum of the previous two columns. <sup>b</sup> T = 298 K. <sup>c</sup> Sum of the five previous columns,  $\Delta G = \Delta E + \Delta\Delta Z_0 + \Delta\Delta E_{\text{thermal}} - T\Delta\Delta S + \Delta\Delta\text{Disp}$ .

**Table S3.** Selected geometries in Å for the monomeric species.

| <b>Deprotonation of one Zn-OH<sub>2</sub> proton by external 4-NPP</b>                                                       |                                                                                                                                        |                                                                                 |                                                                      |                      |
|------------------------------------------------------------------------------------------------------------------------------|----------------------------------------------------------------------------------------------------------------------------------------|---------------------------------------------------------------------------------|----------------------------------------------------------------------|----------------------|
|                                                                                                                              | <b>Zn-OH<sub>2</sub></b>                                                                                                               | <b>ZnOH<sub>2</sub>-O<sub>3</sub>POC<sub>6</sub>H<sub>4</sub>NO<sub>2</sub></b> | <b>ZnHO-HO<sub>3</sub>POC<sub>6</sub>H<sub>4</sub>NO<sub>2</sub></b> | <b>Zn-N(average)</b> |
|                                                                                                                              | [Zn(bTSC)(PO <sub>4</sub> C <sub>6</sub> H <sub>4</sub> NO <sub>2</sub> ) <sub>2</sub> (H <sub>2</sub> O)] <sup>2-</sup>               |                                                                                 |                                                                      |                      |
| Reactants                                                                                                                    | 2.07                                                                                                                                   | 2.65                                                                            | 1.00                                                                 | 2.17                 |
| Transition state                                                                                                             | 2.07                                                                                                                                   | 2.39                                                                            | 0.99                                                                 | 2.18                 |
| Products                                                                                                                     | 1.94                                                                                                                                   | 1.06                                                                            | 1.43                                                                 | 2.19                 |
|                                                                                                                              | [Zn(bTSC)(PO <sub>4</sub> C <sub>6</sub> H <sub>4</sub> NO <sub>2</sub> ) <sub>2</sub> (H <sub>2</sub> O) <sub>3</sub> ] <sup>2-</sup> |                                                                                 |                                                                      |                      |
| Reactants                                                                                                                    | 2.00                                                                                                                                   | 1.70                                                                            | 1.03                                                                 | 2.16                 |
| Transition state                                                                                                             | 1.93                                                                                                                                   | 1.17                                                                            | 1.16                                                                 | 2.18                 |
| Products                                                                                                                     | 1.92                                                                                                                                   | 1.02                                                                            | 1.53                                                                 | 2.19                 |
| <b>Direct hydroxyl migration of Zn-OH to the phosphor in 4-NPP</b>                                                           |                                                                                                                                        |                                                                                 |                                                                      |                      |
|                                                                                                                              | <b>Zn-OH</b>                                                                                                                           | <b>H<sub>(2)</sub>O-PO<sub>4</sub>C<sub>6</sub>H<sub>4</sub>NO<sub>2</sub></b>  | <b>O<sub>3</sub>P-OC<sub>6</sub>H<sub>4</sub>NO<sub>2</sub></b>      | <b>Zn-N(average)</b> |
|                                                                                                                              | [Zn(bTSC)(PO <sub>4</sub> C <sub>6</sub> H <sub>4</sub> NO <sub>2</sub> )(OH)] <sup>-</sup> + DMSO                                     |                                                                                 |                                                                      |                      |
| Reactants                                                                                                                    | 1.91                                                                                                                                   | 3.66                                                                            | 1.73                                                                 | 2.16                 |
| Transition state                                                                                                             | 1.94                                                                                                                                   | 2.10                                                                            | 2.01                                                                 | 2.13                 |
| Products                                                                                                                     | 2.10                                                                                                                                   | 1.70                                                                            | 4.08                                                                 | 2.11                 |
| <b>Water splitting and formation of Zn-OH<sub>2</sub>, HPO<sub>4</sub><sup>2-</sup> and 4-NP through intermediary waters</b> |                                                                                                                                        |                                                                                 |                                                                      |                      |
|                                                                                                                              | <b>Zn-OH</b>                                                                                                                           | <b>H<sub>(2)</sub>O-PO<sub>4</sub>C<sub>6</sub>H<sub>4</sub>NO<sub>2</sub></b>  | <b>O<sub>3</sub>P-OC<sub>6</sub>H<sub>4</sub>NO<sub>2</sub></b>      | <b>Zn-N(average)</b> |
|                                                                                                                              | [Zn(bTSC)(PO <sub>4</sub> C <sub>6</sub> H <sub>4</sub> NO <sub>2</sub> )(OH)] <sup>-</sup> + H <sub>2</sub> O                         |                                                                                 |                                                                      |                      |
| Reactants                                                                                                                    | 1.93                                                                                                                                   | 3.47                                                                            | 1.72                                                                 | 2.21                 |
| Transition state                                                                                                             | 1.96                                                                                                                                   | 2.28                                                                            | 2.62                                                                 | 2.18                 |
| Products                                                                                                                     | 2.08                                                                                                                                   | 1.74                                                                            | 4.92                                                                 | 2.16                 |
|                                                                                                                              | [Zn(bTSC)(PO <sub>4</sub> C <sub>6</sub> H <sub>4</sub> NO <sub>2</sub> )(OH)] <sup>-</sup> + 6 H <sub>2</sub> O                       |                                                                                 |                                                                      |                      |
| Reactants                                                                                                                    | 1.90                                                                                                                                   | 3.78                                                                            | 1.74                                                                 | 2.35                 |
| Transition state                                                                                                             | 1.92                                                                                                                                   | 2.22                                                                            | 2.25                                                                 | 2.29                 |
| Products                                                                                                                     | 2.05                                                                                                                                   | 1.67                                                                            | 5.81                                                                 | 2.23                 |
|                                                                                                                              | [Zn(bTSC)(PO <sub>4</sub> C <sub>6</sub> H <sub>4</sub> NO <sub>2</sub> )(OH)] <sup>-</sup> + 10 H <sub>2</sub> O                      |                                                                                 |                                                                      |                      |
| Reactants                                                                                                                    | 1.98                                                                                                                                   | 3.25                                                                            | 1.75                                                                 | 2.32                 |
| Transition state                                                                                                             | 1.96                                                                                                                                   | 2.17                                                                            | 2.27                                                                 | 2.22                 |
| Products                                                                                                                     | 2.10                                                                                                                                   | 1.67                                                                            | 4.81                                                                 | 2.20                 |

**Table S4.** Selected geometries in Å for the dimeric species.

|                                                                                                                        | <b>Zn-OH<sub>2</sub></b> | <b>Zn-OPO<sub>3</sub></b> | <b>Zn-N(average)</b> |
|------------------------------------------------------------------------------------------------------------------------|--------------------------|---------------------------|----------------------|
| [Zn <sub>2</sub> (bTSC) <sub>2</sub> (PO <sub>4</sub> C <sub>6</sub> H <sub>5</sub> )(OH)] <sup>3-</sup> ( <b>A</b> )  | 1.95/1.96                | 1.96                      | 2.25                 |
| [Zn <sub>2</sub> (bTSC) <sub>2</sub> (PO <sub>4</sub> C <sub>6</sub> H <sub>5</sub> )(OH)] <sup>3-</sup> ( <b>B</b> )  | 1.96/1.96                | 1.93                      | 2.24                 |
| [Zn <sub>2</sub> (bTSC) <sub>2</sub> (HPO <sub>4</sub> C <sub>6</sub> H <sub>5</sub> )(OH)] <sup>2-</sup>              | 1.97/2.02                | 2.01                      | 2.15                 |
| [Zn <sub>2</sub> (bTSC) <sub>2</sub> (PO <sub>4</sub> C <sub>6</sub> H <sub>5</sub> )(H <sub>2</sub> O)] <sup>2-</sup> | 2.10/2.14                | 1.92                      | 2.13                 |
| [Zn <sub>2</sub> (bTSC) <sub>2</sub> (HPO <sub>4</sub> )] <sup>2-</sup>                                                | -                        | 1.99/2.00 <sup>a</sup>    | 2.28                 |

<sup>a</sup> This PO<sub>4</sub> binds to Zn in a bidentate fashion.

**Table S5.** Relative energies in kcal mol<sup>-1</sup> for different conformations of monomeric and dimeric species in DMSO.

|                                       | $\Delta\text{Def2-SVP}$                                | $\Delta\Delta\text{ Def2-TZVPP}$ | $\Delta E^a$ | $\Delta\Delta Z_0$ | $\Delta\Delta E_{\text{thermal}}^b$ | $-T\Delta\Delta S^b$ | $\Delta\Delta\text{Disp}$ | $\Delta G^c$ |
|---------------------------------------|--------------------------------------------------------|----------------------------------|--------------|--------------------|-------------------------------------|----------------------|---------------------------|--------------|
|                                       | Monomer $[\text{Zn}(\text{bTSC})(\text{DMSO})_2]^{2+}$ |                                  |              |                    |                                     |                      |                           |              |
| <b>1<sub>A</sub></b>                  | 0.0                                                    | 0.0                              | <b>0.0</b>   | 0.0                | 0.0                                 | 0.0                  | 0.0                       | <b>0.0</b>   |
| <b>1<sub>B</sub></b>                  | -0.5                                                   | 0.9                              | <b>0.3</b>   | 1.9                | -1.0                                | 2.7                  | 4.5                       | <b>8.4</b>   |
| <b>1<sub>TS</sub></b>                 | 10.2                                                   | 1.1                              | <b>11.2</b>  | 0.2                | -0.9                                | 2.7                  | 0.9                       | <b>14.0</b>  |
|                                       | Dimer $\{[\text{Zn}(\text{bTSC})]_2(\text{OH})\}^-$    |                                  |              |                    |                                     |                      |                           |              |
| <b>2<sub>A</sub> + OH<sup>-</sup></b> | 0.0                                                    | 0.0                              | <b>0.0</b>   | 0.0                | 0.0                                 | 0.0                  | 0.0                       | <b>0.0</b>   |
| <b>2<sub>B</sub></b>                  | -47.8                                                  | 27.5                             | <b>-20.3</b> | 4.1                | -0.8                                | 9.2                  | 12.5                      | <b>4.8</b>   |
| <b>2<sub>C</sub></b>                  | -61.2                                                  | 28.0                             | <b>-33.2</b> | 2.6                | 0.0                                 | 5.8                  | 15.9                      | <b>-9.0</b>  |

<sup>a</sup> Electronic energy, sum of the previous two columns. <sup>b</sup> T = 298 K. <sup>c</sup> Free energy, sum of the previous five columns.

# Coordinates

The coordinates are provided in .xyz-format, with charge/multiplicity in parenthesis in the comment row.

| First proton abstraction step | [Zn(bTSC)(PO <sub>2</sub> C <sub>6</sub> H <sub>4</sub> NO <sub>2</sub> ) <sub>2</sub> (H <sub>2</sub> O)] <sup>2-</sup> Reactant                                       | Transition state | [Zn(bTSC)(PO <sub>2</sub> C <sub>6</sub> H <sub>4</sub> NO <sub>2</sub> ) <sub>2</sub> (H <sub>2</sub> O)] <sup>2-</sup> Product                                       |
|-------------------------------|-------------------------------------------------------------------------------------------------------------------------------------------------------------------------|------------------|------------------------------------------------------------------------------------------------------------------------------------------------------------------------|
| O                             | -0.69968 1.15192 -4.95143                                                                                                                                               | C                | 3.02442 -4.94277 -3.51209                                                                                                                                              |
| O                             | -2.99807 0.16877 -5.684                                                                                                                                                 | H                | 4.21004 -5.08803 -0.30616                                                                                                                                              |
| O                             | -1.48798 1.34347 -7.45572                                                                                                                                               | O                | 5.11372 -7.26421 -1.17104                                                                                                                                              |
| C                             | 0.0631 0.05317 -4.8727                                                                                                                                                  | N                | 4.78666 -8.23937 -3.6402                                                                                                                                               |
| C                             | 0.74602 -0.18798 -3.65923                                                                                                                                               | H                | 3.34326 -6.46146 -5.01481                                                                                                                                              |
| C                             | 1.55375 -1.30645 -3.51188                                                                                                                                               | H                | 2.46787 -4.26635 -4.16096                                                                                                                                              |
| C                             | 1.68312 -2.20173 -4.58252                                                                                                                                               | S                | -4.25142 -1.88967 -1.00238                                                                                                                                             |
| C                             | 1.02096 -1.97783 -5.79665                                                                                                                                               | S                | 2.35701 3.76534 -0.64879                                                                                                                                               |
| C                             | 0.21854 -0.85422 -5.94617                                                                                                                                               | N                | -2.58826 -3.44378 -2.40137                                                                                                                                             |
| H                             | 0.61816 0.51946 -2.83774                                                                                                                                                | N                | -1.6976 -2.70713 -0.46783                                                                                                                                              |
| H                             | 2.07977 -1.50378 -2.57842                                                                                                                                               | N                | -1.34824 -1.69408 0.40187                                                                                                                                              |
| N                             | 2.52182 -3.38229 -4.43084                                                                                                                                               | N                | -0.15573 0.09071 1.84885                                                                                                                                               |
| H                             | 1.1508 -2.6859 -6.61476                                                                                                                                                 | N                | 1.89658 0.92713 0.56485                                                                                                                                                |
| H                             | -0.28363 -0.63888 -6.88965                                                                                                                                              | N                | 2.94873 1.13076 -0.29095                                                                                                                                               |
| S                             | -7.6968 1.66786 -4.96637                                                                                                                                                | N                | 4.16916 2.24353 -1.85684                                                                                                                                               |
| S                             | -0.54118 6.51808 -3.9164                                                                                                                                                | C                | -2.79936 -2.69571 -1.29504                                                                                                                                             |
| N                             | -5.93427 0.15565 -6.2853                                                                                                                                                | C                | -3.01695 -2.31954 2.13192                                                                                                                                              |
| N                             | -5.19008 0.83253 -4.27307                                                                                                                                               | H                | -3.23411 -3.19456 1.51027                                                                                                                                              |
| N                             | -4.87735 1.80182 -3.33829                                                                                                                                               | H                | -2.76022 -2.63951 3.1536                                                                                                                                               |
| N                             | -3.54978 3.27815 -1.70514                                                                                                                                               | H                | -3.92611 -1.70158 2.18383                                                                                                                                              |
| N                             | -1.30154 3.71725 -2.85585                                                                                                                                               | N                | -1.90221 -1.51419 1.55185                                                                                                                                              |
| N                             | -0.16954 8.3878 -3.6392                                                                                                                                                 | C                | -1.24146 -0.45585 2.38744                                                                                                                                              |
| N                             | 1.19647 4.9076 -5.11711                                                                                                                                                 | N                | -1.65766 -0.08418 3.67476                                                                                                                                              |
| C                             | -6.2241 0.87426 -5.17707                                                                                                                                                | H                | -2.55081 -0.51458 4.1262                                                                                                                                               |
| C                             | -6.63948 1.17003 -1.69929                                                                                                                                               | C                | -0.90506 0.86882 4.3609                                                                                                                                                |
| H                             | -6.98341 0.43833 -2.43655                                                                                                                                               | H                | -1.20877 1.1865 5.36045                                                                                                                                                |
| H                             | -6.40284 0.66927 -0.74731                                                                                                                                               | O                | 0.24191 1.41815 3.77547                                                                                                                                                |
| N                             | -7.44059 1.90211 -1.51562                                                                                                                                               | H                | 0.83705 2.15744 4.31124                                                                                                                                                |
| C                             | -5.45546 1.92898 -2.19245                                                                                                                                               | C                | 0.5954 0.99068 2.48977                                                                                                                                                 |
| C                             | -4.70005 2.81088 -1.23562                                                                                                                                               | C                | 1.81825 1.44032 1.74283                                                                                                                                                |
| C                             | -5.03319 3.00654 0.11597                                                                                                                                                | C                | 2.83373 2.31672 2.39987                                                                                                                                                |
| H                             | -5.98524 2.66045 0.51431                                                                                                                                                | H                | 2.97262 2.02291 3.45038                                                                                                                                                |
| C                             | -4.11315 3.65999 0.93287                                                                                                                                                | H                | 3.79584 2.24934 1.87574                                                                                                                                                |
| H                             | -4.34596 3.82966 1.98605                                                                                                                                                | H                | 2.50998 3.36918 2.37423                                                                                                                                                |
| C                             | -2.87646 4.07994 0.4197                                                                                                                                                 | C                | 3.19594 2.33256 -0.93355                                                                                                                                               |
| H                             | -2.14022 4.55244 1.0692                                                                                                                                                 | H                | -3.32009 -3.46903 -3.09968                                                                                                                                             |
| C                             | -2.62356 3.8605 -0.93673                                                                                                                                                | H                | -1.61914 -3.64955 -2.6688                                                                                                                                              |
| C                             | -1.32282 4.13164 -1.63327                                                                                                                                               | H                | -0.82883 -3.01118 -0.98922                                                                                                                                             |
| C                             | -0.18182 4.75538 -0.90112                                                                                                                                               | H                | 2.9946 0.29958 -0.898                                                                                                                                                  |
| H                             | -0.11315 4.35884 0.12141                                                                                                                                                | H                | 4.391 3.06003 -2.41245                                                                                                                                                 |
| H                             | 0.76303 4.5698 -1.42702                                                                                                                                                 | H                | 4.73112 1.40623 -1.97614                                                                                                                                               |
| H                             | -0.32944 5.84528 -0.83563                                                                                                                                               | O                | 4.54158 -8.55052 -4.80256                                                                                                                                              |
| C                             | 0.1931 5.02333 -4.23501                                                                                                                                                 | O                | 5.44845 -8.94264 -2.8814                                                                                                                                               |
| H                             | -6.61722 0.12733 -7.0309                                                                                                                                                | H                | -0.14578 1.9049 -1.18281                                                                                                                                               |
| H                             | -4.95824 -0.09157 -6.47218                                                                                                                                              | O                | -2.98213 1.95781 -1.17649                                                                                                                                              |
| H                             | -4.28707 0.51637 -4.71955                                                                                                                                               | P                | -3.49203 2.39011 0.26857                                                                                                                                               |
| H                             | -0.0973 2.99743 -4.42299                                                                                                                                                | O                | -4.8199 3.09895 0.17169                                                                                                                                                |
| H                             | 1.50048 5.73012 -5.62308                                                                                                                                                | O                | -3.24225 1.36195 1.3485                                                                                                                                                |
| H                             | 1.69598 4.03558 -5.26311                                                                                                                                                | O                | -2.26222 3.61826 0.54263                                                                                                                                               |
| O                             | 2.60989 -4.15997 -5.37598                                                                                                                                               | C                | -3.37744 4.83865 2.31051                                                                                                                                               |
| O                             | 3.10475 -3.54955 -3.36391                                                                                                                                               | C                | -2.32197 4.4727 1.55947                                                                                                                                                |
| H                             | -2.7774 5.72477 -4.08664                                                                                                                                                | H                | -4.3394 4.40857 2.02984                                                                                                                                                |
| O                             | -6.63383 5.45252 -4.15385                                                                                                                                               | C                | -0.98205 5.05539 1.88665                                                                                                                                               |
| P                             | -6.92445 5.62575 -2.67242                                                                                                                                               | H                | -0.1081 4.76242 1.30075                                                                                                                                                |
| O                             | -7.89823 6.7196 -2.25828                                                                                                                                                | H                | 0.0849 6.41694 3.18319                                                                                                                                                 |
| O                             | -6.90146 4.36966 -1.79618                                                                                                                                               | C                | -0.07327 5.96675 2.92527                                                                                                                                               |
| C                             | -5.23516 6.38028 -2.25716                                                                                                                                               | C                | -2.01826 6.30815 3.66148                                                                                                                                               |
| C                             | -5.81662 7.53575 -0.22484                                                                                                                                               | C                | -3.26593 5.74661 3.35432                                                                                                                                               |
| C                             | -4.89093 7.10542 -1.21905                                                                                                                                               | H                | -4.13925 6.03818 3.93754                                                                                                                                               |
| H                             | -6.86718 7.28167 -0.37015                                                                                                                                               | N                | -1.90956 7.25939 4.75317                                                                                                                                               |
| C                             | -3.52522 7.48621 -1.07457                                                                                                                                               | O                | -2.92251 7.53882 5.38972                                                                                                                                               |
| H                             | -2.8132 7.16376 -1.83708                                                                                                                                                | O                | -0.80831 7.74688 4.9966                                                                                                                                                |
| H                             | -2.05574 8.52807 0.11536                                                                                                                                                |                  |                                                                                                                                                                        |
| C                             | -3.10137 8.24088 0.0055                                                                                                                                                 |                  |                                                                                                                                                                        |
| C                             | -4.03256 8.63966 0.97967                                                                                                                                                |                  |                                                                                                                                                                        |
| C                             | -5.38771 8.28765 0.85662                                                                                                                                                |                  |                                                                                                                                                                        |
| H                             | -6.09164 8.61997 1.61993                                                                                                                                                |                  |                                                                                                                                                                        |
| N                             | -3.5935 9.4221 2.11166                                                                                                                                                  |                  |                                                                                                                                                                        |
| O                             | -4.42488 9.75753 2.95561                                                                                                                                                |                  |                                                                                                                                                                        |
| O                             | -2.40273 9.72535 2.19281                                                                                                                                                |                  |                                                                                                                                                                        |
| H                             | -0.51590 -4.10880 0.70140                                                                                                                                               |                  |                                                                                                                                                                        |
| First proton abstraction step | [Zn(bTSC)(PO <sub>2</sub> C <sub>6</sub> H <sub>4</sub> NO <sub>2</sub> )(PO <sub>2</sub> OHC <sub>6</sub> H <sub>4</sub> NO <sub>2</sub> )(OH)] <sup>2-</sup> Reactant | Transition state | [Zn(bTSC)(PO <sub>2</sub> C <sub>6</sub> H <sub>4</sub> NO <sub>2</sub> )(PO <sub>2</sub> OHC <sub>6</sub> H <sub>4</sub> NO <sub>2</sub> )(OH)] <sup>2-</sup> Product |
| O                             | 0.29492 -3.34162 -2.11142                                                                                                                                               | C                | 3.570572 -5.314197 -1.225857                                                                                                                                           |
| O                             | 1.9155 -2.0472 -3.69069                                                                                                                                                 | C                | 4.474899 -6.160917 -0.546806                                                                                                                                           |
| C                             | 3.2662 -4.55055 -2.17248                                                                                                                                                | C                | 5.018973 -7.268857 -1.179820                                                                                                                                           |
| C                             | 4.02882 -5.40147 -1.33614                                                                                                                                               | C                | 4.657430 -7.543240 -2.505860                                                                                                                                           |
| C                             | 4.52905 -6.60399 -1.81087                                                                                                                                               | C                | 3.766800 -6.714348 -3.198856                                                                                                                                           |
| C                             | 4.26885 -6.97771 -3.13754                                                                                                                                               | C                | 3.225921 -5.601787 -2.566043                                                                                                                                           |
| C                             | 3.52098 -6.14968 -3.98576                                                                                                                                               | H                | 4.731830 -5.924510 0.487399                                                                                                                                            |
|                               |                                                                                                                                                                         | H                | 5.714675 -7.929143 -0.663202                                                                                                                                           |
|                               |                                                                                                                                                                         | H                | 5.221230 -8.707885 -3.175296                                                                                                                                           |
|                               |                                                                                                                                                                         | N                | 3.512180 -6.947827 -4.232319                                                                                                                                           |
|                               |                                                                                                                                                                         | N                | 2.554911 -4.927392 -3.097995                                                                                                                                           |
|                               |                                                                                                                                                                         | S                | -4.076060 -2.820613 -0.282972                                                                                                                                          |
|                               |                                                                                                                                                                         | S                | 2.360220 2.939906 0.198224                                                                                                                                             |
|                               |                                                                                                                                                                         | N                | -2.307123 -4.500639 -1.379255                                                                                                                                          |
|                               |                                                                                                                                                                         | N                | -1.668127 -3.713742 0.640078                                                                                                                                           |

|                                                                                                                       |           |           |                                                                                                 |           |           |            |          |          |            |          |          |
|-----------------------------------------------------------------------------------------------------------------------|-----------|-----------|-------------------------------------------------------------------------------------------------|-----------|-----------|------------|----------|----------|------------|----------|----------|
| N 3.230415                                                                                                            | 4.453033  | -6.723886 | C -0.602292                                                                                     | 1.342382  | 3.895674  | H 1.10283  | 4.24175  | -1.54133 | C 4.72618  | -1.92310 | 0.36203  |
| C -3.441907                                                                                                           | -0.320729 | -5.755863 | H -0.137977                                                                                     | 2.246323  | 4.289614  | H 1.38838  | 2.66901  | -0.81772 | C 6.03989  | -2.44332 | 0.72725  |
| C -4.089974                                                                                                           | 0.621936  | -2.509158 | C -0.046041                                                                                     | 0.650023  | 2.810505  | O -1.94996 | -1.82192 | -4.33432 | C 7.19056  | -2.07432 | 0.07108  |
| H -4.131935                                                                                                           | -0.396932 | -2.910845 | C 1.249911                                                                                      | 1.014099  | 2.136750  | S -0.72945 | -0.88957 | -4.44993 | C 7.53363  | -1.15447 | -1.00640 |
| H -3.961935                                                                                                           | 0.585080  | -1.416153 | C 2.098293                                                                                      | 2.114624  | 2.684628  | O -0.57835 | -0.55145 | -6.23166 | C 5.88414  | -0.61691 | -1.40352 |
| H -5.050803                                                                                                           | 1.111709  | -2.726648 | H 2.134255                                                                                      | 2.049354  | 3.782628  | H -1.28644 | 0.75068  | -3.89966 | C 4.72882  | -0.98053 | -0.75258 |
| C -2.959445                                                                                                           | 1.379542  | -3.124540 | H 3.117211                                                                                      | 2.058683  | 2.284257  | O 0.21465  | 0.19101  | -6.39955 | H 6.07789  | -3.15294 | 1.55953  |
| C -2.496203                                                                                                           | 2.669150  | -2.506585 | H 1.681871                                                                                      | 3.096816  | 2.412180  | H -0.31350 | -1.50478 | -6.70836 | H 8.16203  | -2.47663 | 0.36200  |
| C -3.126612                                                                                                           | 3.310419  | -1.430955 | C 3.007631                                                                                      | 1.238524  | -0.492577 | H -1.54939 | -0.19357 | -6.60273 | N 8.32241  | -0.77411 | -1.67991 |
| H -4.043801                                                                                                           | 2.915886  | -0.994141 | H -3.010254                                                                                     | -5.078045 | -2.013830 | H -1.49629 | 0.68944  | -2.81430 | H 5.86456  | 0.08948  | -2.23493 |
| C -2.546803                                                                                                           | 4.480221  | -0.930856 | H -1.369315                                                                                     | -5.135375 | -1.378893 | H -0.47661 | 1.47308  | -4.08165 | H 3.76164  | -0.56668 | -1.05388 |
| H -3.018833                                                                                                           | 5.007812  | -0.099758 | H -0.774787                                                                                     | -4.182109 | 0.246540  | O -2.19237 | 1.01813  | -4.46368 | S -4.85144 | -2.33144 | -0.72817 |
| C -1.357188                                                                                                           | 4.969362  | -1.479357 | H 2.812052                                                                                      | -0.711527 | 0.069143  | O 7.57455  | -2.65666 | -2.94687 | S -0.66974 | 4.90463  | -0.08899 |
| H -0.893886                                                                                                           | 5.870510  | -1.078007 | H 4.346762                                                                                      | 1.548609  | -1.988281 | O 8.29380  | -3.19783 | -0.98312 | N -2.40002 | -3.11002 | -1.47991 |
| C -0.786672                                                                                                           | 4.272020  | -2.553402 | H 4.535548                                                                                      | 0.024775  | -1.194138 | O 2.65173  | -0.20257 | 0.47950  | N -2.51942 | -2.41646 | 0.67616  |
| C 0.522113                                                                                                            | 4.627420  | -3.207704 | O 4.977005                                                                                      | -9.520933 | -3.540570 | O 0.58035  | -1.24151 | -0.63245 | N -2.79123 | -2.13102 | 1.47362  |
| C 1.372770                                                                                                            | 5.716228  | -2.641804 | O 6.098138                                                                                      | -9.727062 | -1.705667 | O 1.46905  | 1.22858  | -1.33988 | N -2.93078 | 0.98156  | 2.64311  |
| H 1.397386                                                                                                            | 5.639692  | -1.544171 | H 1.638305                                                                                      | -1.567056 | -2.780610 | C 3.63771  | -0.78675 | -0.10920 | N -0.92587 | 2.33241  | 1.79654  |
| H 2.394622                                                                                                            | 5.656535  | -3.033971 | O 1.456925                                                                                      | -0.604775 | -2.960322 | C 4.75862  | -1.22182 | 0.67768  | N 0.27089  | 2.72069  | 1.21473  |
| O 1.965286                                                                                                            | 6.703589  | -2.908517 | H 2.285340                                                                                      | -0.163407 | -2.719989 | C 5.84269  | -1.86351 | 0.11352  | N 1.87666  | 3.12646  | -0.83508 |
| C 2.295018                                                                                                            | 4.857656  | -5.827250 | H 0.005867                                                                                      | -0.392695 | -1.714105 | C 6.63771  | -0.78675 | -0.10920 | C -3.21309 | -2.62655 | -0.52505 |
| H -3.745564                                                                                                           | -1.388867 | -7.454429 | O -1.006078                                                                                     | 1.996258  | -0.195385 | C 7.57455  | -2.65666 | -2.94687 | C -4.75271 | -2.31522 | 2.63609  |
| H -2.115414                                                                                                           | -1.477849 | -6.796771 | P -2.294050                                                                                     | 4.911491  | -1.813225 | C 4.75862  | -1.22182 | 0.67768  | H -4.46023 | -3.25967 | 2.16463  |
| H -1.528126                                                                                                           | -0.543525 | -5.155271 | O -0.812627                                                                                     | 5.164240  | -1.668204 | H -1.46038 | 0.30909  | -1.62078 | H -4.77662 | -2.43535 | 3.73146  |
| H 2.114230                                                                                                            | 2.909903  | -5.257591 | O -3.116914                                                                                     | 5.535662  | -2.903926 | O 0.86939  | 0.24115  | -0.33254 | H 5.76914  | -2.06283 | 2.30032  |
| H 3.626156                                                                                                            | 5.162329  | -7.330758 | O -3.040256                                                                                     | 5.438643  | -0.314760 | O 2.65173  | -0.20257 | 0.47950  | C -3.79026 | -1.23025 | 2.28467  |
| H 3.802979                                                                                                            | 3.630251  | -6.550999 | C -2.044352                                                                                     | 7.646826  | -0.240340 | O 0.58035  | -1.24151 | -0.63245 | C -3.87463 | 0.10720  | 2.98681  |
| O 4.149497                                                                                                            | -5.953834 | -8.907777 | C -2.999650                                                                                     | 6.679548  | 0.161653  | O 1.46905  | 1.22858  | -1.33988 | C -4.84030 | 0.47500  | 3.93404  |
| O 5.248545                                                                                                            | -6.182144 | -7.062217 | H -1.279179                                                                                     | 7.357045  | -0.960674 | C 3.63771  | -0.78675 | -0.10920 | H -5.63139 | -0.21008 | 4.23869  |
| H 0.887943                                                                                                            | 2.051201  | -8.135947 | C -3.966841                                                                                     | 7.037185  | 1.133456  | C 4.75862  | -1.22182 | 0.67768  | C -4.76468 | 1.76145  | 4.48182  |
| H 0.679482                                                                                                            | 3.017010  | -8.281196 | H -4.696704                                                                                     | 6.284265  | 1.437506  | C 5.84269  | -1.86351 | 0.11352  | H -5.50734 | 2.07812  | 5.21669  |
| O 1.506182                                                                                                            | 3.473004  | -8.061225 | H -4.733986                                                                                     | 8.591011  | 2.425725  | S 5.86626  | -2.10435 | -1.27505 | C -3.74626 | 2.64587  | 4.10411  |
| H -0.656955                                                                                                           | 3.245208  | -7.106010 | C -3.990115                                                                                     | 8.310312  | 1.680685  | C 4.78991  | -1.68484 | -2.08235 | H -3.69117 | 3.64455  | 4.53761  |
| O -1.777455                                                                                                           | 5.486271  | -5.610917 | C -3.042365                                                                                     | 9.255065  | 1.259019  | C 3.70320  | -1.04212 | -1.52121 | C -2.81197 | 2.20514  | 3.15774  |
| P -3.115741                                                                                                           | 8.294080  | -7.044370 | C -2.071940                                                                                     | 8.923682  | 0.303154  | H 4.72177  | -1.03111 | 1.75316  | C -1.61427 | 2.98995  | 2.65964  |
| N -1.636625                                                                                                           | 8.620490  | -6.957275 | H -1.341934                                                                                     | 9.674884  | 0.002197  | H 6.68387  | -2.19325 | 0.72361  | C -1.28893 | 4.32242  | 3.24575  |
| O -3.977915                                                                                                           | 8.924189  | -8.110572 | N -3.064576                                                                                     | 10.592909 | 1.824085  | N 6.98762  | -2.77565 | -1.86619 | H -1.31749 | 4.25992  | 4.34525  |
| C -3.821917                                                                                                           | 8.906449  | -5.519469 | O -2.231934                                                                                     | 11.407116 | 1.433478  | H 4.83364  | -1.87434 | -3.15530 | H -0.30092 | 4.65803  | 2.91219  |
| C -2.860146                                                                                                           | 11.124549 | -5.620537 | O -3.915539                                                                                     | 10.856064 | 2.670007  | H 2.87841  | -0.70115 | -2.14415 | H -2.02903 | 5.07425  | 2.93167  |
| C -3.779154                                                                                                           | 10.164181 | -5.117118 | O -2.665849                                                                                     | 3.357038  | -1.652972 | S -4.19327 | -2.32939 | -0.79492 | C 0.29236  | 3.53967  | 0.08142  |
| H -2.129036                                                                                                           | 10.797975 | -6.360467 | H -2.000405                                                                                     | 2.841370  | -1.083763 | S -1.64302 | 5.31708  | -0.54615 | H -2.81907 | -3.29105 | -2.38460 |
| C -4.702086                                                                                                           | 10.571015 | -4.116877 | H -0.109458                                                                                     | 2.367314  | -0.282204 | N -1.63490 | -2.62435 | -1.53780 | H -1.39311 | -2.85374 | -1.43590 |
| H -5.404619                                                                                                           | 9.828413  | -3.732771 |                                                                                                 |           |           | N -1.89765 | -2.11214 | 0.66354  | H -1.50471 | -2.43847 | 0.50173  |
| H -5.427424                                                                                                           | 12.186464 | -2.878387 | <b>Direct Zn-OH- migration</b>                                                                  |           |           | N -2.38429 | -1.08709 | 1.45879  | H 0.78648  | 1.83909  | 1.07217  |
| C -4.717409                                                                                                           | 11.872340 | -3.643011 | <b>[Zn(bTSC)(PO<sub>4</sub>C<sub>6</sub>H<sub>5</sub>NO<sub>2</sub>(OH))<sup>-</sup> + DMSO</b> |           |           | N -3.12152 | 1.18684  | 2.41803  | H 1.27750  | 3.70881  | -1.66062 |
| C -3.806008                                                                                                           | 12.804932 | -4.164191 | <b>Reactants</b>                                                                                |           |           | N -1.44894 | 2.91354  | 1.56685  | H 1.40682  | 2.11634  | -0.95438 |
| C -2.879587                                                                                                           | 12.428379 | -5.149008 | 66                                                                                              |           |           | N -0.33627 | 3.50736  | 0.99635  | O -2.13758 | 0.02892  | -3.19449 |
| H -2.176504                                                                                                           | 13.170089 | -5.520068 | (-1/1)                                                                                          |           |           | N 0.59960  | 3.93336  | -1.03650 | S -1.28632 | -0.74962 | -4.22695 |
| N -3.819225                                                                                                           | 14.168659 | -3.675460 | Zn -1.37149                                                                                     | 0.71146   | 0.98238   | C -2.52849 | -2.35964 | -0.56953 | C -2.16468 | -0.48172 | -5.79180 |
| O -3.015425                                                                                                           | 14.970389 | -4.148069 | O 0.60941                                                                                       | 0.38766   | 1.11766   | C -4.16821 | -2.43094 | 2.55990  | O 1.37366  | 0.29043  | -4.52633 |
| O -4.634153                                                                                                           | 14.472647 | -2.805940 | O -2.08020                                                                                      | 0.91122   | -0.77523  | C -3.68946 | -3.30367 | 2.10262  | H -1.57584 | -0.91100 | -6.61458 |
| O -3.438248                                                                                                           | 6.713832  | -6.805459 | H -2.83408                                                                                      | 0.31131   | -0.87690  | H -4.18172 | -2.54778 | 3.65652  | C -3.12759 | -1.00174 | -5.70194 |
| H -2.622766                                                                                                           | 6.163147  | -6.222714 | P 1.34964                                                                                       | -0.19495  | -0.12963  | H -5.20975 | -2.28308 | 2.21154  | H -2.31951 | 5.98004  | -5.92603 |
| H -0.929355                                                                                                           | 5.951769  | -5.701818 | O 2.85541                                                                                       | -0.57961  | 0.62859   | C -3.42568 | -1.18209 | 2.21203  | H 0.73406  | 0.29881  | -3.57738 |
|                                                                                                                       |           |           | O 0.79688                                                                                       | -1.55020  | -0.57763  | C -3.81788 | 0.13208  | 2.84263  | H 0.77469  | -0.15706 | -5.33108 |
|                                                                                                                       |           |           | O 1.65180                                                                                       | 0.86414   | -1.18540  | C -4.83247 | 0.30654  | 3.79487  | H -0.16531 | 1.30191  | -4.79248 |
| <b>First proton abstraction step through H<sub>2</sub>O</b>                                                           |           |           | C 3.93092                                                                                       | -1.07319  | 0.00867   | H -5.42385 | -0.53446 | 4.15689  | O 8.25457  | 0.03575  | -2.62062 |
| <b>[Zn(bTSC)(PO<sub>4</sub>C<sub>6</sub>H<sub>5</sub>NO<sub>2</sub>(PO<sub>3</sub>OH)C<sub>6</sub>H<sub>5</sub>NO</b> |           |           | C 4.92844                                                                                       | -1.66087  | 0.82155   | C -5.07111 | 1.60033  | 4.27139  | O 9.40921  | -1.25698 | -1.31753 |
| <b>)(OH)(H<sub>2</sub>O)]<sup>2-</sup></b>                                                                            |           |           | C 6.07998                                                                                       | -2.19184  | 0.26061   | H -5.86040 | 1.76813  | 5.00684  |            |          |          |
| <b>Product</b>                                                                                                        |           |           | C 6.24714                                                                                       | -2.14477  | -1.13078  | C -4.30091 | 2.68034  | 3.82316  |            |          |          |
| 81                                                                                                                    |           |           | C 5.27459                                                                                       | -1.56415  | -1.95498  | H -4.48217 | 3.68581  | 4.20342  |            |          |          |
| (-2/1)                                                                                                                |           |           | C 4.12339                                                                                       | -1.02775  | -1.39269  | C -3.29629 | 2.42685  | 2.88001  |            |          |          |
| Zn 0.049188                                                                                                           | -1.302579 | 0.492816  | H 4.76783                                                                                       | -1.68815  | 1.90098   | C -2.31374 | 3.44930  | 2.34732  |            |          |          |
| O 1.630546                                                                                                            | -2.443332 | 0.060795  | H 6.85130                                                                                       | -2.64788  | 0.88036   | C -2.35102 | 4.86328  | 2.82543  |            |          |          |
| O -0.693179                                                                                                           | -0.406565 | -1.029043 | N 7.45136                                                                                       | -2.70331  | -1.72651  | H -2.39245 | 4.88490  | 3.92612  |            |          |          |
| H -0.896947                                                                                                           | 1.036709  | -0.559953 | H 5.43629                                                                                       | -1.53346  | -3.03221  | H -1.47092 | 5.41076  | 2.47079  |            |          |          |
| P 1.626754                                                                                                            | -3.619033 | -0.967426 | H 3.37012                                                                                       | -0.54351  | -2.01396  | H -3.24841 | 5.37627  | 2.44652  |            |          |          |
| O 3.043559                                                                                                            | -4.430612 | -0.421523 | S -4.07012                                                                                      | -2.09458  | -0.91624  | H -2.04208 | 4.21181  | -0.20409 |            |          |          |
| O 0.494191                                                                                                            | -4.630247 | -0.740076 | O -0.92705                                                                                      | 5.27832   | 0.05617   | H -2.00466 | -2.58365 | -2.48304 |            |          |          |
| O 1.889616                                                                                                            | -3.194330 | -2.405926 | N -1.55888                                                                                      | -2.67517  | -1.65243  | H -0.70066 | -2.18088 | -1.41209 |            |          |          |
| C 3.549264                                                                                                            | -5.549608 | -0.952893 | N -1.79102                                                                                      | -2.25132  | 0.57317   | H -0.89745 | -1.90786 | 0.48245  |            |          |          |
| C 4.470640                                                                                                            | -6.275321 | -0.163454 | N -2.19246                                                                                      | -1.25306  | 1.44964   | H 0.34739  | 2.73092  | 0.94808  |            |          |          |
| C 5.046355                                                                                                            | -7.443773 | -0.639524 | N -2.71400                                                                                      | 0.96052   | 2.64286   | H 0.60545  | 4.45238  | -1.90784 |            |          |          |
| C 4.701162                                                                                                            | -7.903963 | -1.917939 | N -0.95205                                                                                      | 2.62773   | 1.87252   | H 1.01941  | 2.97434  | -1.06517 |            |          |          |
| C 3.794666                                                                                                            | -7.198292 | -2.719111 | N 0.21192                                                                                       | 3.19012   | 1.35220   | O -1.86925 | -0.35956 | -3.41833 |            |          |          |
| C 3.222050                                                                                                            | -6.025164 | -2.244027 | N 1.05967                                                                                       | 3.65351   | -0.71636  | S -0.87947 | 0.05584  | -4.52040 |            |          |          |
| H 4.715001                                                                                                            | -5.895564 | 0.830385  | C -2.41670                                                                                      | -2.34566  | -0.67839  | C -1.92726 | 0.52924  | -5.93545 |            |          |          |
| H 5.755021                                                                                                            | -8.010388 | -0.036470 | C -4.05337                                                                                      | -2.55873  | 2.46331   | C -0.27531 | 1.71028  | -4.06594 |            |          |          |
| N 5.298337                                                                                                            | -9.132289 | -2.421788 | H -3.63852                                                                                      | -3.42039  | 1.92818   | H -1.29738 | 0.92532  | -6.74484 |            |          |          |
| H 3.553049                                                                                                            | -7.575192 | -3.712606 | H -4.08428                                                                                      | -2.77524  | 3.54368   | H -2.43748 | -0.38577 | -6.26535 |            |          |          |
| H 2.538897                                                                                                            | -5.445418 | -2.864431 | H -5.08612                                                                                      | -2.40079  | 2.11981   | H -2.65945 | 1.27514  | -5.59449 |            |          |          |
| S -4.163888                                                                                                           | -3.161163 | -0.341490 | C -3.21783                                                                                      | -1.34327  | 2.22926   | O 0.32907  | 1.57688  | -3.15294 |            |          |          |
| S 2.317516                                                                                                            | 2.769032  | -0.578277 | C -3.48356                                                                                      | -0.07104  | 2.99003   | H 0.33612  | 2.10092  | -4.89269 |            |          |          |
| N -2.364056                                                                                                           | -4.918849 | -1.251221 | C -4.44094                                                                                      |           |           |            |          |          |            |          |          |

H -3.47708 -0.72139 4.27404  
O 1.259620 1.25188 4.38388  
C -2.91551 1.42578 5.41332  
C -1.86937 2.23149 3.70369  
H 1.61516 3.17140 4.19255  
C -1.49255 1.98022 2.37634  
C -0.73703 2.96255 1.52984  
C -0.13534 4.17419 2.16871  
H 0.38410 3.87530 3.09335  
H 0.57893 4.65281 1.48899  
H -0.90295 4.91747 2.42761  
C -0.52830 4.52537 -1.16988  
H -3.98669 -4.03763 -2.62830  
H -2.28129 -3.69499 -2.48105  
H 1.52477 -2.31785 -1.11470  
H 0.32810 2.72838 -1.43959  
H -0.43249 5.58110 -2.89505  
H 0.35376 4.01614 -2.94303  
H -0.56363 1.57087 -2.74656  
O 0.33319 1.96809 -2.99619  
H 0.91286 1.16141 -2.98570  
O 7.43761 -0.89878 1.28363  
O 7.23362 -2.92021 2.01742

**Water splitting and OH<sup>-</sup> coordination to P  
[Zn(bTSC)(PO<sub>4</sub>C<sub>6</sub>H<sub>4</sub>NO<sub>2</sub>(OH))<sub>2</sub>]<sup>-</sup> + H<sub>2</sub>O**  
Transition state  
59

(-1/1)  
Zn -0.68800 0.83988 0.52061  
O 1.10069 0.71833 -0.38252  
O -1.78073 1.24240 -1.05965  
H -1.94140 0.38821 -1.48928  
P 1.23046 0.10994 -1.79665  
O 1.87454 -2.05699 -0.46987  
O 0.13726 -0.79293 -2.31179  
O 2.52457 0.31435 -2.51906  
C 2.95722 -2.28267 0.16604  
C 3.01607 -3.18489 1.29136  
C 4.19345 -3.42767 1.96857  
C 5.38487 -2.78429 1.56940  
C 5.37163 -1.89003 0.47558  
C 4.19823 -1.64435 -0.20526  
H 2.09116 -3.68117 1.59712  
H 4.22494 -4.11260 2.81656  
N 6.60293 -3.03526 2.27382  
H 6.30294 -1.40120 0.18726  
H 4.16466 -0.94935 -1.04728  
S -3.32328 -2.77839 0.02974  
S -1.77529 5.60903 0.07570  
N -1.17633 -3.19804 -1.53212  
N -0.70560 -2.25918 0.47815  
N -0.95409 -1.17487 1.30975  
N -1.17684 1.05639 2.59375  
N -0.31584 2.95000 1.08562  
N 0.19951 3.73803 0.08243  
N -0.13264 4.82848 -1.88216  
C -1.68218 -2.73850 -0.36058  
C -1.75381 -2.62099 3.15854  
H -1.44291 -3.46116 2.52822  
H -1.25294 -2.68242 4.13722  
H -2.83873 -2.69674 3.32852  
C -1.42742 -1.32327 2.49769  
C -1.55160 -0.03482 3.26336  
C -1.96918 0.06139 4.59744  
H -2.29418 -0.81724 5.15412  
H -1.95315 1.32149 5.20370  
C -1.27707 1.43004 6.24053  
H -1.50693 2.43917 4.49299  
H -1.47201 3.41946 4.96793  
C -1.11209 2.26369 3.15884  
C -0.56817 3.35778 2.27918  
C -0.25625 4.69580 2.86763  
H 0.31503 4.55546 3.79954  
H 0.32587 5.30260 2.16585  
H -1.17588 5.24737 3.11136  
C -0.53887 4.69951 -0.59936  
H -1.86730 -3.54416 -2.18890  
H -0.42972 -2.61158 -1.93506  
H 0.26778 -2.19617 0.07922  
H 0.74043 3.12544 -0.53529  
H -0.64750 5.49140 -2.45040  
H 0.22660 3.99065 -2.35464  
H -0.70777 1.71446 -1.96491  
O 0.10530 1.95378 -2.53968  
H -0.13347 1.79573 -3.46574  
O 7.63611 -2.46113 1.98082  
O 6.59167 -3.81960 3.23077

**Water splitting and OH<sup>-</sup> coordination to P  
[Zn(bTSC)(PO<sub>4</sub>C<sub>6</sub>H<sub>4</sub>NO<sub>2</sub>(OH))<sub>2</sub>]<sup>-</sup> + H<sub>2</sub>O**  
Products  
59

(-1/1)  
Zn -1.16232 1.22009 -0.00708  
O 0.31170 1.82305 -1.14454  
O -2.47502 0.74452 -1.55228  
H -2.73650 -0.20381 -1.51770  
P 0.84515 1.21911 -2.50939  
O 2.10496 -2.03638 0.96288

O 1.14431 -0.27756 -2.43586  
O 1.84875 2.11083 -3.19425  
C 2.91932 -2.98751 0.70602  
C 2.65149 -4.00223 -0.28439  
C 3.54413 -5.02367 -0.53813  
C 4.75878 -5.09890 0.17592  
C 5.06498 -4.12452 1.15032  
C 4.17529 -3.10216 1.40688  
H 1.71523 -3.93742 -0.84413  
H 3.32817 -5.78430 -1.28911  
N 5.67993 -6.16117 -0.08878  
H 6.00972 -4.19851 1.68973  
H 4.40403 -2.34259 2.15909  
S -2.77170 -2.36253 -0.83614  
S -4.09801 4.83314 -1.40833  
N -0.26731 -2.49600 -1.82844  
N -0.42576 -1.72573 0.31226  
N -0.98618 -0.69917 1.02108  
N -1.53335 1.63232 2.03572  
N -1.74849 3.31313 0.12539  
N -1.54531 3.99708 -1.06175  
N -2.24607 4.17117 -3.21980  
C -1.07751 -2.18183 -0.80137  
C -0.22669 -1.71724 3.12928  
H -0.58813 -2.69737 2.78009  
H 0.86420 -1.71141 2.96372  
H -0.43138 -1.60829 4.20006  
C -0.85023 -0.63604 2.30942  
C -1.36588 0.63465 2.90756  
C -1.68330 0.83148 4.26151  
H -1.55893 0.03502 4.99457  
C -2.18285 2.07704 4.64915  
H -2.44563 2.25354 5.69402  
C -2.34477 3.10271 3.70935  
H -2.72220 4.07932 4.01274  
C -1.99921 2.83723 2.37988  
C -2.04369 3.84303 1.25527  
C -2.30046 5.28658 1.53315  
H -1.69665 5.61821 2.39193  
H -2.06697 5.89314 0.65072  
H -3.36083 5.44612 1.78315  
C -2.58869 4.30649 -1.92030  
H -0.74085 -2.92046 -2.62977  
H 0.44935 -1.75618 -2.05445  
H 0.62963 -1.90621 0.46561  
H -0.75640 3.50040 -1.50534  
H -2.95245 4.39677 -3.91044  
H -1.52541 3.49743 -3.49086  
H -1.92855 0.87097 -2.37497  
O -0.65005 1.37724 -3.38581  
H -0.56851 1.00388 -4.27719  
O 6.73878 -6.20769 0.54834  
O 5.39153 -7.00334 -0.94707

**Water splitting and OH<sup>-</sup> coordination to P  
[Zn(bTSC)(PO<sub>4</sub>C<sub>6</sub>H<sub>4</sub>NO<sub>2</sub>(OH))<sub>2</sub>]<sup>-</sup> + 6 H<sub>2</sub>O**  
Reactant  
74

(-1/1)  
Zn 1.03610 -0.73987 0.47182  
S 2.34424 -1.74131 5.09146  
S 3.74489 -0.55430 -2.77425  
N 1.34494 0.69268 5.53596  
N 0.77906 -0.14671 3.51408  
N 0.54692 -1.08188 2.55920  
N 0.02548 -2.59718 0.41791  
N 0.97685 -1.80611 -2.08354  
N 1.15325 -1.18449 -3.26862  
N 2.17458 0.18577 -4.77682  
O -0.03924 0.77805 -0.16208  
C 1.43702 -0.36536 4.71758  
C -0.71919 -2.53668 4.11750  
H -0.05377 -3.15992 4.73571  
H -0.92662 -1.62019 4.68705  
H -1.66496 -3.07131 3.95476  
C -0.08290 -2.18402 2.80981  
C -0.26054 -3.09231 1.64025  
C -0.73714 -4.40066 1.79554  
H -0.95008 -4.80088 2.78556  
C -0.92791 -5.18653 0.65972  
H -1.27710 -6.21651 0.75473  
C -0.68452 -4.64091 -0.59700  
H -0.84207 -5.23706 -1.49487  
C -0.20529 -3.32234 -0.68934  
C 0.03392 -2.68891 -2.01559  
C -0.82111 -3.08403 -3.19235  
H -1.41042 -2.21849 -3.54298  
H -0.20122 -3.43437 -4.03435  
H -1.54054 -3.87003 -2.94226  
C 2.29450 -0.50121 -3.62612  
H 1.87795 0.67107 6.39657  
H 0.66185 1.45089 5.37580  
H 0.96630 0.81390 3.10916  
H 0.42535 -1.27492 -3.97665  
H 2.99654 0.66614 -5.12243  
H 1.30229 0.31399 -5.29234  
O 2.90567 -0.39935 0.40983  
S 3.19477 -0.65588 -0.48385  
P -1.33385 1.45422 0.40033  
O -2.49595 1.06005 -0.83520

O -1.93498 0.76864 1.61349  
O 1.22819 2.97591 0.38666  
C -2.25753 1.12390 -2.14433  
C -3.08602 0.35911 -2.99978  
C -2.83843 0.30462 -4.36395  
C -1.74036 1.00524 -4.88433  
C -0.94867 1.82459 -4.06665  
H -1.22068 1.90525 -2.70994  
H -3.90205 -0.21434 -2.55619  
H -3.45280 -0.30563 -5.02622  
N -1.38638 0.84049 -6.27863  
H -0.12962 2.39605 -4.50341  
H -0.63630 2.55810 -2.06362  
H -2.44894 1.60995 2.94909  
O -2.72292 2.23344 3.67963  
H -2.85513 3.07246 3.17228  
H -1.47823 2.48717 4.59741  
O -0.66514 2.72943 5.16679  
H -1.03128 3.02488 6.01332  
H 0.00428 4.00180 4.20495  
O 0.44727 4.57261 3.52834  
H 1.22290 4.91842 3.99361  
H 1.16555 3.08937 2.80186  
O 1.62609 2.24049 2.61795  
H 1.92400 2.28421 1.67125  
O 2.38732 2.16519 0.03205  
H 1.46775 1.95106 -0.22608  
H 2.74389 1.23066 0.15714  
H -2.19325 3.88282 1.35417  
O -2.84088 4.35439 1.95755  
H -3.68085 4.27023 1.48359  
O -0.22026 1.08119 -6.61037  
O -2.23982 0.45538 -7.06545

**Water splitting and OH<sup>-</sup> coordination to P  
[Zn(bTSC)(PO<sub>4</sub>C<sub>6</sub>H<sub>4</sub>NO<sub>2</sub>(OH))<sub>2</sub>]<sup>-</sup> + 6 H<sub>2</sub>O**  
Transition state  
74

(-1/1)  
Zn 0.51814 0.16296 0.22885  
S 1.58463 -0.12194 4.69433  
S 3.11492 0.93922 -2.51806  
O 0.22752 2.16167 4.88338  
N -0.47074 0.81761 3.18648  
N -0.36565 -0.18461 2.24662  
N -0.39900 -1.77928 0.16205  
N 0.49524 -0.67051 -2.10703  
N 0.62958 0.12874 -3.18890  
N 1.37608 2.01766 -4.21752  
O -0.15971 1.87717 -0.44703  
C 0.39667 0.99666 4.23134  
H -1.21203 -1.87464 3.84464  
H -0.40031 -2.34490 4.42162  
H -1.57980 -1.02198 4.42983  
H -2.02330 -2.60366 3.71363  
C -0.69949 -1.39891 2.52394  
C -0.64755 -2.33692 1.35807  
C -0.90668 -3.70843 1.47168  
H -1.09671 -4.16545 2.44191  
C -0.92221 -4.48306 0.30935  
H -1.10989 -5.55680 0.36919  
C -0.71163 -3.87775 -0.92766  
H -0.73295 -4.47152 -1.84078  
C -0.44432 -2.49872 -0.96681  
C -0.20845 -1.74929 -2.23167  
C -0.80160 -2.21481 -3.53067  
H -1.65730 -1.57505 -3.81224  
H -0.05857 -2.15699 -4.34195  
H -1.17911 -3.24113 -3.47395  
C 1.63719 1.05506 -3.31752  
H 0.87765 2.36463 5.63199  
H -0.41513 2.90856 4.58560  
H -0.84894 1.66795 2.69897  
H -0.10106 0.11106 -3.90024  
H 2.10216 2.69173 -4.42792  
H 0.43554 2.20652 -4.55439  
O 2.39280 -0.06440 0.57900  
H 2.76092 -0.22755 -0.30524  
P -0.84590 3.01853 0.33863  
O -2.72626 2.75388 -0.86128  
H -1.65495 2.59875 1.56730  
O -0.69588 4.44137 -0.10778  
C -2.74342 2.72920 -2.15253  
C -3.68341 1.89845 -2.85011  
C -3.73869 1.85746 -4.23102  
C -2.85447 2.64990 -4.98835  
C -1.92136 3.48657 -4.34201  
C -1.86002 3.52338 -2.96137  
H 4.36238 1.28920 -2.24816  
H -4.45485 1.21965 -4.74967  
N -2.90649 2.61032 -6.42383  
H -1.26470 4.10979 -4.95108  
H -1.14726 4.16590 -2.44276  
H -2.86174 3.45215 2.30445  
O -3.42388 4.14382 2.74591  
H -3.67168 4.68587 1.96329  
H -2.17191 4.52239 3.70640  
H -1.36100 4.56857 4.30452  
H -1.66913 4.97575 5.12698  
H 0.05883 5.23902 3.57865

**Water splitting and OH<sup>-</sup> coordination to P  
[Zn(bTSC)(PO<sub>4</sub>C<sub>6</sub>H<sub>4</sub>NO<sub>2</sub>(OH))<sub>2</sub>]<sup>-</sup> + 6 H<sub>2</sub>O**  
Products  
74

(-1/1)  
Zn 1.05788 -1.00276 0.27820  
S 1.92260 -1.38744 4.76360  
S 4.16393 -0.48279 -2.10985  
N 0.68941 0.96945 4.91714  
N 0.04555 -0.28296 3.13335  
N 0.13094 -1.30724 2.22030  
N 0.16396 -2.91252 0.15561  
N 1.38937 -1.86068 -1.94897  
N 1.67494 -1.04599 -3.00264  
N 2.60630 0.86496 -3.80237  
O 0.91929 0.78794 -0.08321  
C 0.83310 -0.19057 4.25186  
C -0.96105 -2.90891 3.75570  
H -0.22213 -3.40317 4.40647  
H -1.32965 -2.02430 4.29189  
H -1.79566 -3.59925 3.57361  
C -0.31826 -2.49035 2.47517  
C -0.24006 -3.44118 1.32089  
C -0.60667 -4.78984 1.40270  
H -0.92895 -5.22845 2.34621  
C -0.55456 -5.56600 0.24164  
H -0.82658 -6.62255 0.27864  
C -0.16279 -4.98820 -0.96510  
H -0.12349 -5.58547 -1.87519  
C 0.20588 -3.63321 -0.97245  
C 0.65251 -2.89854 -2.18928  
C 0.23734 -3.32995 -3.56344  
H -0.56907 -2.68193 -3.95242  
H 1.08820 -3.23714 -4.25645  
H -0.13186 -4.36134 -3.58178  
C 2.73828 -0.18708 -2.98260  
H 1.27664 1.10916 5.72946  
H 0.03309 1.71826 4.64845  
H -0.20206 0.61259 2.58855  
H 0.87841 -0.87811 -3.61287  
H 3.88816 1.49636 -3.92395  
H 1.71706 1.08418 -4.24684  
O 3.01169 -1.44825 0.71644  
H 3.40117 -1.56244 -0.17993  
P 0.45194 2.05302 0.43435  
O -5.09612 2.95570 -1.02978  
O -0.61529 1.64113 1.49581  
O 0.10084 3.22078 -0.43095  
C 4.29782 2.32000 -1.77719  
C -4.76831 1.30899 -2.92395  
C -3.90420 0.58142 -3.49072  
C -2.50540 0.82216 -3.42120  
C -2.00324 1.81482 -2.53940  
C -2.86434 2.53534 -1.75001  
H -5.84647 1.13401 -2.75712  
H -4.27093 -0.18649 -4.17292  
N 1.62343 0.04153 -4.18417  
H -0.93127 1.98149 -2.44516  
H -2.45498 3.26973 -1.05483  
H -2.03426 2.29671 2.02255  
O -2.76714 2.70978 2.55720  
H -3.15558 3.39925 1.96592  
H -1.72632 3.13704 3.67229  
O -0.96238 3.27086 4.32938  
H -1.34461 3.70647 5.10449  
H 0.43781 3.95976 3.62092  
O 1.30251 4.23051 3.21649  
H 1.94131 4.10429 3.93325  
H 1.64396 3.09398 2.01669  
H 1.82011 2.39762 1.32323  
H 3.24974 1.51362 1.17240  
O 4.04612 0.93772 1.02729  
H 4.9352 0.99155 0.06601  
H 3.43996 -0.57942 1.00209  
H -4.35434 3.93288 0.09799  
O -3.83295 4.48360 0.75366  
H -4.46278 5.13634 1.08881  
O -0.39894 0.33838 -4.19505  
O -2.04268 -0.93157 -4.82796

**Water splitting and OH<sup>-</sup> coordination to P  
[Zn(bTSC)(PO<sub>4</sub>C<sub>6</sub>H<sub>4</sub>NO<sub>2</sub>(OH))<sub>2</sub>]<sup>-</sup> + 10 H<sub>2</sub>O**  
Reactant  
86

(-1/1)  
Zn 0.85339 -0.81686 0.66084



S 1.38962 -1.18829 5.30552  
S 3.86322 -2.77170 -2.82524  
N 0.09383 1.12423 5.18565  
N -0.45345 -0.32089 3.50607  
N -0.18474 -1.31692 2.57987  
N 0.09463 -2.91499 0.50828  
N 1.15567 -1.75553 -1.63593  
N 1.74327 -1.05318 -2.65290  
N 3.31296 -0.58526 -4.23005  
O -0.48894 0.35815 -0.22633  
O 0.29672 -0.07965 4.61529  
C -1.21874 -3.02887 4.03793  
H -0.49912 -3.58545 4.65843  
H -1.59477 -2.18832 4.63234  
H -2.05078 -3.70060 3.78332  
C -0.54277 -2.53278 2.80077  
C -0.31961 -3.46904 1.65318  
C -0.58470 -4.84242 1.74680  
H -0.90280 -5.29134 2.68678  
H -0.42698 -5.62855 0.60555  
H -0.62050 -6.70227 0.64571  
C -0.02481 -5.03202 -0.58812  
H 0.09794 -5.63259 -1.48842  
C 0.23919 -3.65150 -0.60076  
C 0.73456 -2.95872 -1.82985  
C 0.66955 -3.67183 -3.14708  
H -0.27758 -4.22450 -3.23253  
H 0.73405 -2.95112 -3.97291  
H 1.50265 -4.38302 -3.26007  
C 2.92756 -1.44289 -3.26555  
H 0.62517 1.32557 6.02352  
H -0.44459 1.89405 4.76676  
H -0.89762 0.47333 2.98751  
H 1.74892 -0.03454 -2.45334  
H 4.20308 -0.73023 -4.68977  
H 2.69685 0.14538 -4.57150  
O 2.78819 -1.25110 0.74957  
H 2.99753 -1.82017 -0.00711  
P -1.21720 1.57910 0.39302  
O -2.70184 1.68782 -0.52852  
O -1.79316 1.29283 1.78859  
O -0.56791 2.93379 0.18233  
C -2.78231 1.89707 -1.85830  
H -1.80046 1.45091 -2.76985  
H -1.96254 1.67571 -4.13187  
C -3.10293 2.34246 -4.59443  
C -4.08765 2.79235 -3.70582  
C -3.92337 2.57307 -2.34523  
H -0.93144 0.91499 -2.39038  
H -1.21501 1.33285 -4.84667  
H -3.26889 2.57244 -6.02463  
H -4.96340 3.31452 -4.08966  
H -4.66378 2.93231 -1.62899  
H -2.81226 2.19812 2.71301  
O -3.29933 2.89125 3.23776  
H -3.84984 3.30051 2.53904  
H -1.90386 3.50506 3.74933  
O -0.98863 3.65110 4.14659  
H -1.12108 4.24884 4.89646  
H 0.52582 3.67279 3.35045  
O 1.45424 3.46288 3.07081  
H 1.88243 3.17531 3.89097  
H 1.31056 1.82920 2.21076  
O 1.61069 0.95868 1.87636  
H 2.41101 1.16464 1.34288  
O 3.82842 1.09311 0.28532  
H 3.40916 1.23549 -0.59405  
H 3.59098 0.12822 0.48880  
H -4.03676 2.63286 0.44476  
O -4.72472 3.19810 0.85453  
H -5.43795 2.57242 1.02511  
H 0.74252 3.46920 -0.63168  
O 1.57385 3.77124 -1.09543  
H 2.22748 3.87320 -0.36133  
O 3.35752 3.78345 1.00472  
H 2.72246 3.75551 1.74969  
H 3.66679 2.85827 0.90428  
H 2.78619 -2.42733 2.07091  
O 2.67603 -3.10013 2.78868  
H 2.30201 -2.57166 3.51664  
O 2.50056 1.60207 -2.13053  
H 2.18455 1.88372 -2.75516  
H 2.08460 2.46758 -1.78391  
O -4.28090 3.15064 -6.40658  
O -2.38964 2.17763 -6.78314

**Water splitting and OH<sup>-</sup> coordination to P**  
**[Zn(bTSC)(PO<sub>4</sub>CaH<sub>2</sub>NO<sub>2</sub>(OH))<sub>2</sub> + 10 H<sub>2</sub>O**  
**Transition state**  
86  
(-1/1)  
Zn 0.38314 0.39450 0.21428  
S 0.97860 -0.17045 4.92580  
S 3.61110 -1.08734 -2.69287  
N -0.19298 2.20964 4.93027  
N -0.81841 0.89499 3.17740  
N -0.63424 -0.05842 2.19063  
N -0.37394 -1.57640 0.05974  
N 0.71789 -0.26420 -1.93459  
N 1.39804 0.50811 -2.83886

N 3.14111 1.05350 -4.19595  
O -0.44636 2.11265 -0.30997  
C -0.05442 1.02785 4.29800  
C -1.70168 -1.80825 3.58062  
H -0.99565 -2.42466 4.15853  
H -2.03428 -0.98607 4.22474  
H -2.56524 -2.43122 3.30729  
C -1.03170 -1.27313 2.35752  
C -0.86481 -2.15746 1.15844  
C -1.22992 -3.51091 1.14630  
H -1.61516 -3.99934 2.04025  
C -1.08072 -4.22934 -0.04118  
H -1.35427 -5.28548 -0.07891  
C -0.58017 -3.59655 -1.17980  
H -0.45810 -4.15130 -2.10910  
C -0.22417 -2.24222 -1.09109  
C 0.38305 -1.47836 -2.22531  
C 0.52690 -2.13188 -3.56265  
H -0.37664 -2.71140 -3.80073  
H 0.67974 -1.37708 -4.34464  
H 1.39193 -2.81351 -3.57660  
C 2.68080 0.18655 -3.27851  
H 0.37517 2.35068 5.75625  
H -0.66171 3.03604 4.54046  
H -1.19303 1.76653 2.72777  
H 1.31793 1.51825 -2.62235  
H 4.09595 0.96607 -4.52168  
H 2.53966 1.75483 -4.61682  
O 2.29861 0.30771 0.62171  
H 2.72748 -0.12923 -0.13393  
P -1.04171 3.26431 0.52150  
O -2.95499 3.35500 -0.68943  
O -1.89251 2.88989 1.73040  
O -0.80477 4.69833 0.12776  
C -3.16899 3.19435 -1.95206  
C -2.44891 2.23981 -2.74805  
C -2.72438 2.06960 -4.09135  
C -3.72512 2.84152 -4.71461  
C -4.44599 3.79659 -3.97051  
C -4.17328 3.97110 -2.62813  
H -1.67335 1.65279 -2.25740  
H -2.17575 1.33919 -4.68676  
N -4.00861 2.65757 -6.10933  
H -5.21047 4.39125 -4.47120  
H -4.71410 4.71902 -2.04433  
H -2.91254 3.96040 2.52611  
O -3.33239 4.74518 2.96296  
H -3.64945 5.24248 2.17525  
H -1.96322 5.04770 3.76158  
O -1.10917 5.00268 4.29676  
H -1.32293 5.39957 5.15369  
O 0.35532 5.44777 3.60215  
O 1.27137 5.44198 3.20846  
H 1.83705 5.14605 3.93795  
H 0.90253 3.99856 2.29408  
O 0.74603 3.18694 1.75381  
H 1.55906 3.09495 1.18112  
O 2.97825 2.79800 0.34699  
H 2.70957 2.88911 -0.59726  
H 2.85059 1.80816 0.52937  
H -3.76957 4.67331 0.04256  
O -4.30384 5.40538 0.46007  
H -5.16334 4.98421 0.60896  
O 0.46484 5.24162 -0.81503  
H 1.29680 5.49793 -1.29451  
H 1.93910 5.61926 -0.55400  
O 2.99146 5.53941 0.89563  
H 3.38982 5.63388 1.65968  
H 3.17533 4.57760 0.85210  
H 2.30054 -1.10524 1.72972  
O 2.17551 -1.90245 2.29812  
H 1.80769 -1.50701 3.10940  
O 2.10327 3.21656 -2.26371  
H 2.89903 3.43355 -2.77100  
H 1.73625 4.11350 -1.96422  
O -4.88980 3.34565 -6.63370  
O -3.36311 1.81672 -6.74273

**Water splitting and OH<sup>-</sup> coordination to P**  
**[Zn(bTSC)(PO<sub>4</sub>CaH<sub>2</sub>NO<sub>2</sub>(OH))<sub>2</sub> + 10 H<sub>2</sub>O**  
**Products**  
86  
(-1/1)  
Zn 0.94263 -1.46132 0.60669  
S 1.79235 -1.20768 5.29826  
S 4.53285 -2.48427 -1.83170  
N 0.16321 0.86855 5.03989  
N -0.21751 -0.77984 3.51001  
N 0.16147 -1.81645 2.67070  
N 0.69367 -3.54310 0.76800  
N 1.48981 -2.31972 -1.40666  
N 2.02910 -1.56181 -2.41836  
N 3.70971 -0.91094 -3.81028  
O -0.07272 0.02593 -0.05287  
C 0.52243 -0.33796 4.56286  
C -0.58766 -3.51193 4.30990  
H 0.22061 -3.88130 4.96065  
H -1.08326 -2.68228 4.82761  
H -1.30609 -4.32806 4.14913  
C -0.01679 -3.04652 3.01207

C 0.32498 -4.04713 1.94846  
C 0.24210 -5.43358 2.13448  
H -0.04123 -5.85736 3.09701  
C 0.54504 -6.26724 1.05637  
H 0.49315 -7.35129 1.17300  
C 0.91848 -5.71514 -0.17054  
H 1.16133 -6.36041 -1.01357  
C 0.98935 -4.31906 -0.28055  
C 1.44629 -3.60684 -1.51550  
C 1.80962 -4.39271 -2.73338  
H 1.08997 -5.20782 -2.89305  
H 1.81820 -3.74636 -3.62024  
H 2.81319 -4.83434 -2.62308  
C 3.38216 -1.63792 -2.73475  
H 0.70625 1.22711 5.81552  
H -0.47065 1.52996 4.57322  
H -0.79941 -0.07960 2.95170  
H 1.71342 -0.57315 -2.38032  
H 4.68566 -0.81147 -4.06384  
H 3.00147 -0.50917 -4.41722  
O 3.01354 -1.19522 0.84241  
H 3.51380 -1.65218 0.12413  
P -0.62630 1.24222 0.76624  
O -4.89928 2.44470 -1.07706  
O -1.60234 0.78542 1.88073  
O -1.14386 2.37600 -0.10576  
C -4.50779 2.76324 -2.24244  
C -4.70210 1.88282 -3.37428  
C -4.27985 2.21710 -4.64253  
C -3.63490 3.45380 -4.87263  
C -3.42393 3.48835 -3.79854  
C -3.84578 4.01921 -2.52878  
H -5.20089 0.92807 -3.18629  
H -4.43265 1.54137 -5.48477  
N -3.19672 3.79689 -6.18577  
H -2.92408 5.29698 -3.99772  
H -3.68439 4.70039 -1.68975  
H -2.80900 1.82862 2.41673  
O -3.35526 2.52799 2.86545  
H -3.69508 3.10457 2.13526  
H -2.13556 3.08815 3.66125  
O -1.27733 3.29882 4.17151  
H -1.55524 3.75927 4.97651  
H -0.03341 3.96492 3.29642  
O 0.81252 4.11383 2.78266  
H 1.50768 4.01713 3.45180  
H 0.70452 2.60939 2.01390  
O 0.76009 1.73182 1.55177  
H 2.22600 1.51017 0.78624  
O 3.09675 1.38809 0.32239  
H 2.82884 1.32554 -0.63012  
C 3.20990 -0.21230 0.71680  
H -4.53753 3.47734 0.10821  
O -4.29420 4.12112 0.84790  
H -5.14043 4.52048 1.09523  
H -0.07849 3.01432 -1.16640  
O 0.67592 3.36215 -1.72818  
H 1.26075 3.78997 -1.06065  
O 2.36048 4.27011 0.30764  
H 1.79351 4.32655 1.10083  
H 2.84034 3.42696 0.41537  
H 3.31633 -2.45330 2.34719  
O 3.23142 -3.15117 3.02035  
H 2.79231 -2.66923 3.74848  
O 2.11751 1.26809 -2.25118  
H 2.78363 1.59145 -2.87567  
H 1.49275 2.06026 -2.10977  
O -2.63353 4.88497 -6.36681  
O -3.39033 2.99786 -7.11217

**[Zn(bTSC)<sub>2</sub>(PO<sub>4</sub>CaH<sub>2</sub>NO<sub>2</sub>(OH))<sub>2</sub>]·(A)**  
86  
(-3/1)  
Zn 1.63880 -0.13210 0.79100  
Zn -1.57170 1.00640 -0.66350  
S 4.49910 3.86490 0.60550  
S 4.02270 -0.49880 0.71590  
S 2.25150 -5.31720 0.28360  
S -2.17000 3.12720 0.24990  
N 1.88310 2.12290 0.70020  
N 2.21150 2.74160 -0.45170  
N 3.79440 4.14910 -1.80510  
N 3.06570 -1.54880 -2.01520  
N 4.24280 -2.02790 -1.59660  
N 5.92940 -2.12480 -0.07930  
N 1.21290 0.57050 2.74610  
N 1.28280 -2.10520 2.22200  
N 1.65120 -3.37200 1.99490  
N 0.33910 -3.46740 0.04540  
N -1.10940 2.14720 -2.40380  
N -1.28280 3.49800 -2.35320  
N -2.01360 5.32670 -1.22130  
N 0.95190 -0.32280 -3.33990  
C 3.26090 3.53010 -0.56440  
C 4.70930 -1.63010 -0.45060  
C 2.93450 -3.50050 -3.53670  
H 4.02320 -3.45740 -3.68330  
H 2.44460 -3.73410 -4.49220  
H 2.74780 -4.33010 -2.83170  
C 2.44940 -2.19560 -2.95460

**[Zn<sub>2</sub>(bTSC)<sub>2</sub>(PO<sub>4</sub>CaH<sub>2</sub>NO<sub>2</sub>(OH))<sub>2</sub>]·(B)**  
86  
(-3/1)  
Zn -2.17860 -0.07130 0.56310  
Zn 1.46950 -0.41830 -0.19900  
S -4.47590 -3.88080 -1.57300  
S -4.40210 0.32780 -0.25450  
S -0.20390 3.31140 1.61920  
S 1.96440 -2.71530 0.27220  
N -2.19400 -2.18050 -0.23220  
N -2.14020 -2.41260 -1.55510  
N -2.72460 -3.38270 -3.52780  
N -2.83050 2.44560 -1.78220  
N -4.05730 2.86620 -1.39310  
N -6.03960 2.38640 -0.39730  
N -2.32550 -1.33700 2.26860  
N -2.41790 1.34700 2.52410  
N -2.71940 2.65860 2.53390  
N -2.42120 4.77930 1.77420  
N 1.36650 -1.11480 -2.22060  
N 1.56540 -2.44130 -2.46130  
N 2.11390 -4.50240 -1.68110  
N -0.47480 1.58410 -2.89040  
C -3.01700 -3.17120 -2.18620  
C -4.78380 1.98450 -2.73800  
C -2.37690 4.80870 -2.36490  
H -3.43560 4.91770 -2.63690  
H -1.75190 5.33520 -3.09960  
H -2.25310 3.50490 -1.38550  
C -2.02840 3.34380 -2.26350  
O -0.64960 2.87680 -2.56800  
C 0.45320 3.73980 -2.39140  
H 0.29890 4.79400 -2.15780  
C 1.74160 3.21200 -2.43850  
H 2.61000 3.84810 -2.24900  
C 1.91280 1.84560 -2.66930  
H 2.89840 1.37990 -2.62490  
O 0.76120 1.07880 -2.90620  
C 0.87440 -0.38760 -3.17360  
C 0.40510 -0.91240 -4.49640



H -4.24250 1.53236 2.09215  
H -3.17395 2.92735 2.39525  
C -3.17924 1.31978 -1.48862  
H 2.79969 -0.06255 -3.00995  
H 2.19914 0.52183 -1.46757  
H 3.50968 -2.32656 0.23502  
H -3.50968 2.32656 0.23502  
H -2.79969 0.06255 -3.00995  
H -2.19914 -0.52183 -1.46757  
S 1.03678 3.10516 -1.09187  
O 1.00501 1.60199 -0.65490  
C 0.01442 3.99543 0.10271  
C 0.00000 3.23063 -2.57029  
H 0.48166 3.84961 1.08514  
H 0.43447 2.54573 -3.31018  
H -1.01262 3.61176 0.08411  
H 0.04337 5.05892 -0.17454  
H 0.08362 4.26653 -2.93007  
H -1.04610 2.97546 -2.35332  
S -1.03678 -3.10516 -1.09187  
O -1.00501 -1.60199 -0.65490  
C 0.00000 -3.23063 -2.57029  
C -0.01442 -3.99543 0.10271  
H -0.43447 -2.54573 -3.31018  
H -0.48166 -3.84961 1.08514  
H -0.08362 -4.26653 -2.93007  
H 1.04610 -2.97546 -2.35332  
H 0.01262 -3.61176 0.08411  
H -0.04337 -5.05892 -0.17454

**ITS [Zn(bTSC)(DMSO)]<sup>2+</sup>**

56  
(0/1)  
Zn 0.00000 0.00000 0.00000  
S 3.18724 3.15224 -0.79883  
S -1.45619 1.50196 1.55049  
N 2.75363 1.89325 1.52063  
N 3.29226 0.51572 -0.25329  
N 2.26187 -0.18218 -0.78278  
N 0.12816 -1.74331 -1.24736  
N -2.11987 -0.79575 -1.26718  
N -3.16551 -0.19065 0.32120  
N -4.10096 1.39000 1.68509  
C 3.04168 1.84504 0.21735  
C 3.88830 -1.93107 -1.33728  
H 4.24045 -2.20267 -0.32544  
H 4.59022 -1.17814 -1.73186  
H 3.94965 -2.83517 -1.95190  
C 2.50463 -1.35640 -1.27566  
C 1.31653 -2.10168 -1.75953  
C 1.40024 -3.12863 -2.71782  
C 2.36081 -3.42109 -3.13939  
C 0.22906 -3.74564 -3.14495  
H 0.26763 -4.53413 -3.89896  
C -0.99960 -3.34682 -2.61198  
H -1.92039 -3.82225 -2.94521  
C -1.01391 -2.32723 -1.65322  
C -2.27513 -1.81830 -1.04154  
C -3.59986 -2.44511 -1.36222  
H -3.49311 -3.50404 -1.62314  
H -4.07421 -1.93273 -2.21687  
H -4.29070 -2.39449 -0.50793  
C -2.98884 0.87245 1.16481  
H 2.59293 2.79652 1.95619  
H 2.36372 1.05187 1.96174  
H 3.95782 -0.01786 0.31008  
H -4.11215 -0.50931 0.11344  
H -4.02844 2.18171 2.31413  
H -5.02821 1.02491 1.48673  
S 1.06514 -1.49766 2.90986  
O 1.14451 -0.46758 1.73827  
C 1.29748 -3.12768 2.15349  
C -0.68052 -1.64537 3.37308  
H 2.32786 -3.16062 1.77731  
H -1.00107 -0.65491 3.71923  
H 0.57286 -3.26473 1.33973  
H 1.16129 -3.88425 2.93931  
H -0.73864 -2.37693 4.19156

H -1.27396 -1.96901 2.50799  
S -1.37236 2.28761 -1.82794  
O -0.19412 1.29524 -1.58182  
C -0.72247 3.91233 -1.35426  
C -1.35444 2.47175 -3.62766  
H -0.65112 3.90837 -0.25927  
H -1.64054 1.49662 -4.04267  
H -1.43107 4.68416 -1.68681  
H 0.26982 4.04165 -1.80713  
H -0.33986 2.74833 -3.94522  
H -2.08963 3.23718 -3.91257

**2A [Zn(bTSC)]<sub>2</sub>**

68  
(0/1)  
Zn 0.00000 0.00000 2.34705  
Zn 0.00000 0.00000 -1.67856  
S 1.95638 -0.10998 -3.23918  
S -0.95185 -1.87856 3.41816  
S -1.95638 0.10998 -3.23918  
S 0.95185 1.87856 3.41816  
N 0.00000 -4.30410 2.93593  
N 1.18531 -2.69926 1.85652  
N -1.53902 -0.95236 -0.12624  
N 1.34636 -1.39782 1.52293  
N 0.37620 -2.12067 -1.67160  
N 1.42302 -2.65880 -2.31705  
N -1.34636 1.39782 1.52293  
N -1.18531 2.69926 1.85652  
N 3.25766 -2.38791 -3.61686  
N -3.25766 2.38791 -3.61686  
N 1.53902 0.95236 -0.12624  
N -0.37620 2.12067 -1.67160  
N 0.00000 4.30410 2.93593  
N -1.42302 2.65880 -2.31705  
C 2.78590 3.00696 -0.11620  
C 3.88623 2.35095 0.42961  
C 0.47762 2.91135 -1.08531  
C 1.62468 2.26943 -0.41107  
C 3.79387 0.98944 0.70822  
C -3.88623 -2.35095 0.42961  
C -2.78590 -3.00696 -0.11620  
C 0.17918 -2.99065 2.66540  
C -3.79387 -0.98944 0.70822  
C -1.62468 -2.26943 -0.41107  
C -0.47762 -2.91135 -1.08531  
C -2.58240 -0.32889 0.44672  
C -2.41849 1.09064 0.85275  
C 2.41849 -1.09064 0.85275  
C 2.18484 -1.81898 -3.01752  
C -0.17918 2.99065 2.66540  
C -2.18484 1.81898 -3.01752  
C 2.58240 0.32889 0.44672  
H -4.80603 -2.89961 0.64385  
H -4.62772 -0.45192 1.16136  
H -2.83809 -4.07081 -0.34394  
H 4.80603 2.89961 0.64385  
H 4.62772 0.45192 1.16136  
H 2.83809 4.07081 -0.34394  
H -3.84145 1.84591 -4.23902  
H 3.37361 -3.39446 -3.57345  
H 0.69032 4.60088 3.61240  
H 0.67450 -4.97592 2.58639  
H -3.37361 3.39446 -3.57345  
H -0.67450 4.97592 2.58639  
H 3.84145 -1.84591 -4.23902  
H -0.69032 -4.60088 3.61240  
C -3.47443 2.10356 0.52389  
H -3.75784 2.67678 1.41950  
H -3.06484 2.82496 -0.20277  
H -4.36124 1.63557 0.07879  
C 0.37358 4.40943 -1.11697  
H 0.57078 4.83977 -0.12372  
H 1.10772 4.84237 -1.81866  
H -0.62622 4.70224 -1.45437  
C 3.47443 -2.10356 0.52389  
H 3.06484 -2.82496 -0.20277  
H 4.36124 -1.63557 0.07879

H 3.75784 -2.67678 1.41950  
C -0.37358 -4.40943 -1.11697  
H -1.10772 -4.84237 -1.81866  
H 0.62622 -4.70224 -1.45437  
H -0.57078 -4.83977 -0.12372

**2B [Zn(bTSC)]<sub>2</sub>(OH)<sub>2</sub>**

70  
(-1/1)  
Zn 2.86275 1.96559 0.05619  
Zn 0.00000 0.00000 0.00000  
S 6.03154 -0.37627 2.43497  
S 2.63123 2.57875 2.34326  
S -0.66396 5.78579 0.87355  
S 0.73505 -2.23452 -0.53803  
N 4.16018 0.19008 0.03998  
N 3.89826 -0.91034 0.77925  
N 4.33013 -2.44143 2.40646  
N 0.07673 0.81150 2.09101  
N 1.03034 0.41828 2.97317  
N 3.05459 0.54229 4.03201  
N 4.47501 2.49052 -1.22069  
N 2.59502 4.32595 -0.65555  
N 1.76875 5.21909 -0.06990  
N -0.00567 4.03257 -1.05063  
N -1.41540 -0.56210 -1.64663  
N -1.09116 -1.52979 -2.50731  
N 0.26618 -3.30524 -2.91745  
N -1.82510 1.08338 0.30971  
C 4.66676 -1.24868 1.79003  
C 2.16041 1.04101 3.11058  
C -0.95955 2.31750 3.75705  
H -0.25976 1.86966 4.47318  
H -1.97800 2.27464 4.17055  
H -0.69400 3.38026 3.62849  
C -0.87682 1.61651 2.43536  
H -1.94955 1.81547 1.41829  
C -3.03917 2.68503 1.57795  
H -3.14802 3.29724 2.47192  
C -3.98374 2.75260 0.54890  
H -4.84053 3.42366 0.64209  
H -3.84077 1.96373 -0.59371  
H 4.58112 2.00339 -1.39281  
C -2.72422 1.11250 -0.68474  
C -2.47904 0.16776 -1.80057  
C -3.43999 0.05160 -2.94629  
H -3.07363 -0.69783 -3.65772  
H -3.55480 1.01601 -3.46821  
H -4.44288 -0.24948 -2.59948  
C 0.47117 4.96962 -0.12801  
C -0.10404 -2.31727 -2.07693  
C 3.96740 6.21828 -1.47529  
H 3.79173 6.50416 -2.52709  
H 5.01541 6.46047 -1.24097  
H 3.30147 6.82014 -0.84474  
C 3.66985 4.76172 -1.24922  
C 4.61991 3.73218 -1.71414  
C 5.66158 4.01768 -2.61914  
H 5.78288 5.02142 -3.02505  
C 6.52898 2.99375 -2.98920  
H 7.34046 3.19099 -3.69325  
C 6.36962 1.71513 -2.44815  
H 7.06192 0.91576 -2.70763  
C 5.31752 1.49444 -1.54698  
C 5.11544 0.20358 -0.83759  
C 5.99229 -0.97778 -1.12241  
O 9.6177 -0.47388  
H 6.31657 -1.00595 -2.17130  
H 5.43971 -1.89921 -0.88937  
H 4.64847 -2.54162 3.36296  
H 3.39634 -2.79566 2.21616  
H 2.83227 -0.40353 4.33741  
H 4.03762 0.63487 3.76180  
H -1.00918 4.08438 -1.19798  
H 0.51933 3.97790 -1.92201  
H -0.20770 -3.40326 -3.80872  
H 1.00312 -3.95014 -2.66690  
O 1.20292 1.34745 -0.81028

H 0.68195 2.17357 -0.85614

**2C [Zn(bTSC)]<sub>2</sub>(OH)<sub>2</sub>**

70  
(-1/1)  
Zn 0.00000 0.00000 0.00000  
S 0.88935 -0.87887 -2.13391  
S 0.06852 2.44337 -2.39505  
N 1.98889 -3.29539 -2.32237  
N 0.60798 -3.10511 -0.52740  
N -0.17098 -2.28749 0.18675  
N -1.56565 -0.43877 1.39758  
N -1.00037 1.98735 0.45879  
N -0.53388 3.19957 0.17544  
N 0.88570 4.53507 -0.96295  
C 1.16325 -2.51700 -1.58896  
C -1.07571 -4.19299 1.49193  
H -0.35703 -4.78102 0.90925  
H -2.09025 -4.57647 1.29091  
H -0.87936 -4.34558 2.56597  
C -0.95307 -2.74407 1.11649  
C -1.78867 -1.71200 1.76929  
C -2.78864 -2.01796 2.70732  
C -2.96254 -3.04553 3.02506  
C -3.56390 -0.97124 3.21305  
H -4.35800 -1.18012 3.93397  
C -3.33273 0.33819 2.79809  
H -3.94565 1.15028 3.18515  
C -2.29473 0.58712 1.87246  
C -1.92552 1.92539 1.39153  
C -2.51621 3.17829 1.97223  
H -3.33870 2.98526 2.67200  
H -2.87963 3.83594 1.16680  
H -1.73419 3.75019 2.49938  
C 0.14440 3.38946 -0.96805  
H 2.44687 -2.92900 -3.14532  
H 2.15501 -4.25446 -2.03734  
H 1.48460 4.72245 -1.75568  
H 1.09718 4.97517 -0.06978  
Zn 2.82616 1.09503 2.36952  
S 4.72307 0.81692 -0.18688  
S 3.57570 3.08860 1.98451  
H 7.04267 -0.34050 0.35945  
N 5.43258 -0.94797 1.82003  
N 4.27840 -0.71874 4.45242  
N 2.19124 -0.13851 4.00883  
N 1.43962 2.33302 3.68524  
N 1.26756 3.64641 3.47633  
N 1.95678 5.47460 2.30486  
C 5.74264 -0.20937 0.74756  
C 4.64373 -2.95103 3.39829  
H 5.68452 -2.73974 3.69360  
H 4.70772 -3.45518 2.42033  
H 4.20622 -3.64406 4.12524  
C 3.88096 -1.66271 3.27305  
C 2.68540 -1.38337 4.08875  
C 2.07337 -2.32290 4.94646  
H 2.44712 -3.34250 5.02312  
C 0.97289 -1.92453 5.70363  
H 0.48519 -2.64012 6.36975  
C 0.49853 -0.61260 5.62195  
H -0.35060 -0.28737 6.22249  
C 1.14567 0.27220 4.74425  
C 0.77405 1.70055 4.60165  
C -0.25330 2.32474 5.50036  
H -1.25337 1.89781 5.31448  
H -0.29389 3.40520 5.31977  
H -0.01731 2.14631 6.56190  
C 2.17246 4.17663 2.66050  
H 7.32511 0.00388 -0.54805  
H 7.62771 -1.01982 0.83419  
H 2.72747 6.00801 1.92084  
H 1.24225 5.98646 2.81460  
O 1.70209 3.37956 0.91156  
H 2.40593 0.23372 0.25409
